# Supplementary material for: Synthesis, solid-state, solution, and theoretical characterization of an “in-cage” scandium-NOTA complex
Source: Royal Society of Chemistry journal article supplement (doi:10.1039/d1dt03887g), 2022-01-01
Supplement: d1dt03887g1.pdf [file d1dt03887g1.pdf]

## Supporting Information

### Synthesis, Solid-State, and Solution Characterization of an “In-Cage” Scandium-NOTA Complex

Kelly E. Aldrich,<sup>a</sup> Ivan A. Popov,<sup>a,b</sup> Harrison D. Root,<sup>a</sup> Enrique R. Batista,<sup>a,\*</sup> Samuel M. Greer,<sup>a</sup> Stosh A. Kozimor,<sup>a,\*</sup> Laura M. Lilley,<sup>a</sup> Maksim Y. Livshits,<sup>a</sup> Veronika Mocko,<sup>a</sup> Michael T. Janicke,<sup>a</sup> Benjamin W. Stein,<sup>a</sup> Ping Yang<sup>a,\*</sup>

<sup>a</sup> Los Alamos National Laboratory, Los Alamos, NM, USA

<sup>b</sup> Department of Chemistry, The University of Akron, Akron, Ohio 44325-3601, USA.

## Table of Contents

|                                                                                                                                                                                                                                                           |    |
|-----------------------------------------------------------------------------------------------------------------------------------------------------------------------------------------------------------------------------------------------------------|----|
| X-Ray Crystallography .....                                                                                                                                                                                                                               | 3  |
| Crystallographic Details of SOLUTION 1 .....                                                                                                                                                                                                              | 3  |
| Discussion of the two [Sc(NOTA)(OOCCH <sub>3</sub> )] <sup>1-</sup> Subunits Present Within the Unit Cell. ....                                                                                                                                           | 3  |
| Figure S1. Molecular structure of Sc(NOTA) (top) and [Sc(NOTA)(OOCCH <sub>3</sub> )] <sup>1-</sup> (bottom). Spacefilling models of the structures (based on VanderWalls radii) are shown for comparison obtained from the single crystal X-ray data..... | 18 |
| HRMS Analysis .....                                                                                                                                                                                                                                       | 19 |
| Figure S2. Mass Spectrum for Sc(NOTA) (ToF, positive mode).....                                                                                                                                                                                           | 19 |
| MS Discussion .....                                                                                                                                                                                                                                       | 19 |
| NMR Spectroscopy .....                                                                                                                                                                                                                                    | 20 |
| General NMR Considerations .....                                                                                                                                                                                                                          | 20 |
| Figure S3. <sup>1</sup> H NMR of Na[Sc(NOTA)(OOCCH <sub>3</sub> )] in D <sub>2</sub> O at 20 °C (pH = 7). Broad peaks indicative of an exchange process. ....                                                                                             | 21 |
| Figure S4. <sup>1</sup> H NMR of Na[Sc(NOTA)(OOCCH <sub>3</sub> )] in DMSO-d <sub>6</sub> at 20 °C.....                                                                                                                                                   | 22 |
| Figure S5. <sup>45</sup> Sc NMR of Na[Sc(NOTA)(OOCCH <sub>3</sub> )] in D <sub>2</sub> O at 20 °C.....                                                                                                                                                    | 23 |
| Figure S6. <sup>45</sup> Sc NMR of Na[Sc-NOTA-OAc] in D <sub>2</sub> O at 40 °C. Peak fitting was applied.....                                                                                                                                            | 24 |
| Figure S7. <sup>45</sup> Sc NMR of Na[Sc-NOTA-OAc] in D <sub>2</sub> O at 80 °C. Peak fitting was applied.....                                                                                                                                            | 25 |
| Figure S8. <sup>17</sup> O NMR spectra of tap water (red) and Na[Sc(NOTA)(OOCCH <sub>3</sub> )] in D <sub>2</sub> O spiked with H <sub>2</sub> ( <sup>17</sup> O) (green) at 25 °C.....                                                                   | 26 |
| Figure S9. <sup>45</sup> Sc NMR of Na[Sc(NOTA)(L)] in dmsO-d <sub>6</sub> at 20 °C. (where L = <sup>-</sup> OOCCH <sub>3</sub> , DMSO, H <sub>2</sub> O or a combination of these) .....                                                                  | 27 |

|                                                                                                                                                                                                                                                               |    |
|---------------------------------------------------------------------------------------------------------------------------------------------------------------------------------------------------------------------------------------------------------------|----|
| Experimental Approximation of Exchange Process Thermodynamics.....                                                                                                                                                                                            | 28 |
| Table S4. Van't Hoff plot parameters for VT <sup>45</sup> Sc NMR species distributions. ....                                                                                                                                                                  | 29 |
| Figure S10. Van't Hoff Plot of VT <sup>45</sup> Sc NMR species distributions in D <sub>2</sub> O (ln(K <sub>eq</sub> ) vs. (1/T)) .....                                                                                                                       | 29 |
| IR Spectroscopy .....                                                                                                                                                                                                                                         | 30 |
| Figure S11. IR spectrum of solid Na[Sc(NOTA)(OOCCH <sub>3</sub> )], recorded in transmittance mode.....                                                                                                                                                       | 30 |
| Discussion of IR.....                                                                                                                                                                                                                                         | 30 |
| Computational Details .....                                                                                                                                                                                                                                   | 32 |
| Figure S12. Coordination of water molecule to Na[Sc(NOTA)(OOCCH <sub>3</sub> )] ( <b>a</b> ) to form Na[Sc(NOTA)(OOCCH <sub>3</sub> )(H <sub>2</sub> O)] ( <b>b</b> ). ....                                                                                   | 32 |
| Table S5. Comparison of the bond distances and RMSD values of the [Sc(NOTA)(OOCCH <sub>3</sub> )] <sup>1-</sup> , Na[Sc(NOTA)(OOCCH <sub>3</sub> )] and 2H <sub>2</sub> O*Na[Sc(NOTA)(OOCCH <sub>3</sub> )] complexes to the experimental XRD structure. .... | 33 |
| Figure S13. Acetate-water substitution in the Na[Sc(NOTA)(OOCCH <sub>3</sub> )] complex ( <b>a</b> ) to form [Sc(NOTA)(OH <sub>2</sub> )] ( <b>b</b> ). ....                                                                                                  | 33 |
| Figure S14. Acetate-water substitution with two water molecules to the Na[Sc(NOTA)(OOCCH <sub>3</sub> )] complex ( <b>a</b> ) to form [Sc(NOTA)(OH <sub>2</sub> ) <sub>2</sub> ] ( <b>b</b> ). ....                                                           | 34 |
| Figure S15. Exchange processes calculated and associated Gibbs free energy change for both the association ( <b>a</b> ) and exchange mechanisms ( <b>b</b> ). ....                                                                                            | 36 |
| Discussion of Bulk Water Treatment Using the Cluster Approach .....                                                                                                                                                                                           | 36 |
| Figure S16. Coordination of DMSO molecule to Na[Sc(NOTA)(OOCCH <sub>3</sub> )]. ....                                                                                                                                                                          | 37 |
| Figure S17. Acetate-DMSO substitution with one ( <b>a</b> ) and two ( <b>b</b> ) DMSO molecules in the Na[Sc(NOTA)(OOCCH <sub>3</sub> )] complex to form [Sc(NOTA)(DMSO)] ( <b>a</b> ) and [Sc(NOTA)(DMSO) <sub>2</sub> ] ( <b>b</b> )                        | 38 |
| Figure S18. Simultaneous addition of DMSO and NaCH <sub>3</sub> COO to [Sc(NOTA)] ( <b>a</b> ) to form Na[Sc(NOTA)(CH <sub>3</sub> COO)(DMSO)] ( <b>b</b> ). ....                                                                                             | 39 |
| References .....                                                                                                                                                                                                                                              | 39 |

## ***X-Ray Crystallography***

Single crystals of  $C_{28}H_{48}N_6Na_3O_{19}Sc_2 \cdot n H_2O$  were grown by layering a solution containing the Na[Sc-NOTA-OAc] complex and byproduct salts in a MeOH/H<sub>2</sub>O solution with acetone and chilling the solution to 10 °C for several days. Crystals were clear and colorless and had a plate-like appearance. A suitable crystal was selected and mounted in paratone oil on a nylon loop. The crystal was irradiated on a Bruker D8 Quest diffractometer configured with an CPAD Photon II<sup>TM</sup> area detector and MoK $\alpha$  ( $\lambda = 0.71073 \text{ \AA}$ ) I $\mu$ S 3.0 micro source<sup>TM</sup>. The crystal was kept at 100.0 K during data collection. Using Olex2 [1], the structure was solved with the ShelXT [2] structure solution program using Intrinsic Phasing and refined with the XL [3] refinement package using Least Squares minimization. For Solution 1 below, the SQUEEZE or BYPASS function was applied.

### ***Crystallographic Details of SOLUTION 1***

The initial structure solution was determined using the Intrinsic Phasing routine in APEX3 software. Refinement of the solution was performed using Olex2<sup>1</sup> software running SHELX Least Squares refinement.<sup>2</sup> The “SQUEEZE” function<sup>3</sup> was applied to the solution to treat a large number of disordered, outersphere waters occupying the void space of the structure.

**Crystal Data** for  $C_{28}H_{48}N_6Na_3O_{19}Sc_2$  ( $M = 931.61 \text{ g/mol}$ ): monoclinic, space group C2/c (no. 15),  $a = 34.9608(7) \text{ \AA}$ ,  $b = 19.7499(4) \text{ \AA}$ ,  $c = 14.5059(3) \text{ \AA}$ ,  $\beta = 107.9050(10)^\circ$ ,  $V = 9530.8(3) \text{ \AA}^3$ ,  $Z = 8$ ,  $T = 100(1) \text{ K}$ ,  $\mu(\text{MoK}\alpha) = 0.382 \text{ mm}^{-1}$ ,  $D_{\text{calc}} = 1.299 \text{ g/cm}^3$ , 53239 reflections measured ( $4.084^\circ \leq 2\theta \leq 55.834^\circ$ ), 11371 unique ( $R_{\text{int}} = 0.0451$ ,  $R_{\text{sigma}} = 0.0359$ ) which were used in all calculations. The final  $R_1$  was 0.0427 ( $I > 2\sigma(I)$ ) and  $wR_2$  was 0.0913 (all data).

### ***Discussion of the two [Sc(NOTA)(OOCCH<sub>3</sub>)]<sup>1-</sup> Subunits Present Within the Unit Cell.***

Overlaying the two [Sc(NOTA)(OOCCH<sub>3</sub>)]<sup>1-</sup> subunits present within the unit cell revealed that the Sc–NOTA and Sc–OOCCH<sub>3</sub> bond distances and angles were nearly identical (Figure 1), and only subtle geometric deviations were apparent. More quantitative evaluation showed slight  $<0.0016 \text{ \AA}$  differences between Sc1–O<sub>NOTA</sub> vs. Sc2–O<sub>NOTA</sub> bond distances, with the only statistically relevant deviation being between Sc1–O5 and Sc2–O13. The Sc1–N<sub>NOTA</sub> vs. Sc2–N<sub>NOTA</sub> distances were similarly similar. Slightly more variation was observed for Sc1–O<sub>OOCCH<sub>3</sub></sub> vs. Sc2–O<sub>OOCCH<sub>3</sub></sub> bonds, with deviations of 0.05 and 0.033  $\text{\AA}$  between the two analogous sets of acetate oxygen atoms, which slightly exceeded the uncertainty of the crystallographic measurement. We suspected that these small differences between the two symmetry inequivalent [Sc(NOTA)(OOCCH<sub>3</sub>)]<sup>1-</sup> fragments were the result of subtle variation in the long range electrostatic interactions imparted by the extended structure of the crystalline material (see below), such as the positions of individual H<sub>2</sub>O molecules and Na<sup>1+</sup> cations.

**Table 1 Crystal data and structure refinement for SOLUTION 1.**

|                                             |                                                                                                |
|---------------------------------------------|------------------------------------------------------------------------------------------------|
| Identification code                         | final_BLS_05-13-22                                                                             |
| Empirical formula                           | C <sub>28</sub> H <sub>70</sub> N <sub>6</sub> Na <sub>3</sub> O <sub>30</sub> Sc <sub>2</sub> |
| Formula weight                              | 1129.79                                                                                        |
| Temperature/K                               | 100.00                                                                                         |
| Crystal system                              | monoclinic                                                                                     |
| Space group                                 | C2/c                                                                                           |
| a/Å                                         | 34.9608(7)                                                                                     |
| b/Å                                         | 19.7499(4)                                                                                     |
| c/Å                                         | 14.5059(3)                                                                                     |
| α/°                                         | 90                                                                                             |
| β/°                                         | 107.9050(10)                                                                                   |
| γ/°                                         | 90                                                                                             |
| Volume/Å <sup>3</sup>                       | 9530.8(3)                                                                                      |
| Z                                           | 8                                                                                              |
| ρ <sub>calc</sub> /cm <sup>3</sup>          | 1.575                                                                                          |
| μ/mm <sup>-1</sup>                          | 0.414                                                                                          |
| F(000)                                      | 4760.0                                                                                         |
| Crystal size/mm <sup>3</sup>                | 0.16 × 0.12 × 0.06                                                                             |
| Radiation                                   | MoKα (λ = 0.71073)                                                                             |
| 2θ range for data collection/°              | 4.084 to 55.834                                                                                |
| Index ranges                                | -45 ≤ h ≤ 45, -25 ≤ k ≤ 19, -18 ≤ l ≤ 19                                                       |
| Reflections collected                       | 53239                                                                                          |
| Independent reflections                     | 11371 [R <sub>int</sub> = 0.0451, R <sub>sigma</sub> = 0.0359]                                 |
| Data/restraints/parameters                  | 11371/4/573                                                                                    |
| Goodness-of-fit on F <sup>2</sup>           | 1.040                                                                                          |
| Final R indexes [I ≥ 2σ (I)]                | R <sub>1</sub> = 0.0427, wR <sub>2</sub> = 0.0876                                              |
| Final R indexes [all data]                  | R <sub>1</sub> = 0.0523, wR <sub>2</sub> = 0.0913                                              |
| Largest diff. peak/hole / e Å <sup>-3</sup> | 0.40/-0.43                                                                                     |

**Fractional Atomic Coordinates (×10<sup>4</sup>) and Equivalent Isotropic Displacement Parameters (Å<sup>2</sup>×10<sup>3</sup>) for SOLUTION 1. U<sub>eq</sub> is defined as 1/3 of of the trace of the orthogonalised U<sub>ij</sub> tensor.**

| Atom | x         | y          | z          | U(eq)     |
|------|-----------|------------|------------|-----------|
| Sc1  | 3614.9(2) | 8394.9(2)  | 891.8(2)   | 10.27(7)  |
| Sc2  | 3297.0(2) | 5816.3(2)  | 4993.4(3)  | 11.61(7)  |
| Na1  | 3066.7(2) | 7023.0(3)  | 1123.7(5)  | 14.10(15) |
| Na2  | 2686.9(2) | 8478.9(4)  | 1164.9(5)  | 13.32(15) |
| Na3  | 2525.6(2) | 10222.8(4) | 1747.7(5)  | 15.52(15) |
| N1   | 3590.8(5) | 8340.0(8)  | -766.4(11) | 13.7(3)   |
| N2   | 4296.3(5) | 8259.0(8)  | 948.1(12)  | 15.1(3)   |
| N3   | 3868.9(4) | 9458.1(8)  | 544.7(12)  | 13.8(3)   |

|     |           |            |             |         |
|-----|-----------|------------|-------------|---------|
| N4  | 3760.1(5) | 4909.0(8)  | 5508.4(13)  | 19.6(4) |
| N5  | 3831.8(5) | 6270.1(10) | 6272.8(13)  | 25.2(4) |
| N6  | 3874.1(5) | 6019.6(10) | 4424.8(13)  | 25.9(4) |
| O1  | 3052.5(4) | 7967.2(6)  | 120.2(9)    | 12.4(3) |
| O2  | 2580.3(4) | 7646.7(6)  | -1230.0(9)  | 14.1(3) |
| O3  | 3780.4(4) | 7340.1(6)  | 1161.1(10)  | 14.9(3) |
| O4  | 4256.7(5) | 6599.9(7)  | 1925.9(13)  | 32.7(4) |
| O5  | 3218.1(4) | 9196.0(6)  | 1033.2(9)   | 14.3(3) |
| O6  | 3173.6(4) | 10227.8(7) | 1619.8(11)  | 23.4(3) |
| O7  | 3327.2(4) | 8021.3(6)  | 2089.5(9)   | 14.1(3) |
| O8  | 3893.7(4) | 8583.3(7)  | 2459.5(10)  | 16.8(3) |
| O9  | 2943.5(4) | 4920.0(6)  | 4842.6(9)   | 14.0(3) |
| O10 | 2890.3(4) | 3797.3(6)  | 4932.3(10)  | 18.2(3) |
| O11 | 3098.1(4) | 5934.9(7)  | 6252.8(10)  | 16.1(3) |
| O12 | 3181.1(5) | 6405.6(8)  | 7707.8(11)  | 25.4(3) |
| O13 | 3151.3(4) | 5623.5(6)  | 3460.0(10)  | 15.8(3) |
| O14 | 3143.9(4) | 6114.2(7)  | 2077.0(10)  | 20.4(3) |
| O15 | 2649.0(4) | 6232.8(6)  | 4303.1(10)  | 16.6(3) |
| O16 | 3180.3(4) | 6881.7(7)  | 4618.5(11)  | 21.0(3) |
| O17 | 2639.2(4) | 10586.9(8) | 3391.4(11)  | 22.7(3) |
| O18 | 2538.5(4) | 9097.0(7)  | 2338.7(10)  | 18.2(3) |
| O19 | 2793.1(5) | 9253.1(9)  | 4354.9(11)  | 32.3(4) |
| C1  | 2915.8(5) | 7873.2(8)  | -806.5(13)  | 11.5(3) |
| C2  | 3196.3(5) | 8058.7(10) | -1376.1(14) | 16.7(4) |
| C3  | 3918.2(6) | 7849.7(10) | -738.8(14)  | 17.7(4) |
| C4  | 4321.0(6) | 8060.7(10) | -33.4(14)   | 17.8(4) |
| C5  | 4145.7(6) | 7162.7(10) | 1570.3(15)  | 18.4(4) |
| C6  | 4457.9(5) | 7712.1(10) | 1655.4(15)  | 16.9(4) |
| C7  | 4519.7(6) | 8898.3(10) | 1299.0(15)  | 17.5(4) |
| C8  | 4310.3(5) | 9488.1(10) | 681.4(15)   | 16.6(4) |
| C9  | 3347.9(6) | 9796.2(9)  | 1280.9(14)  | 15.4(4) |
| C10 | 3758.1(5) | 9961.3(9)  | 1172.4(15)  | 16.7(4) |
| C11 | 3632.6(6) | 9588.3(9)  | -485.2(14)  | 16.6(4) |
| C12 | 3674.4(6) | 9017.9(9)  | -1141.9(14) | 16.7(4) |
| C13 | 3612.5(6) | 8303.5(9)  | 2721.2(14)  | 15.3(4) |
| C14 | 3621.2(7) | 8336.7(11) | 3758.3(15)  | 24.6(4) |
| C15 | 3089.3(6) | 4326.6(9)  | 5020.5(13)  | 14.2(4) |
| C16 | 3540.1(6) | 4257.9(9)  | 5320.9(15)  | 18.7(4) |
| C19 | 3282.3(6) | 6312.0(10) | 6975.1(14)  | 17.9(4) |
| C20 | 3644.3(6) | 6681.2(11) | 6866.1(16)  | 25.5(5) |
| C23 | 3300.9(6) | 6002.5(9)  | 2948.6(14)  | 16.3(4) |
| C24 | 3698.6(6) | 6340.8(12) | 3470.0(15)  | 24.5(5) |

|      |           |            |            |          |
|------|-----------|------------|------------|----------|
| C27  | 2799.2(6) | 6810.9(9)  | 4277.3(14) | 16.1(4)  |
| C28  | 2543.4(6) | 7404.3(10) | 3827.6(15) | 21.6(4)  |
| C17A | 3879.7(8) | 5047.4(13) | 6608.6(18) | 17.0(5)  |
| C18A | 4070.1(8) | 5746.3(15) | 6850(2)    | 18.1(6)  |
| C21A | 4065.0(9) | 6760.6(15) | 5817(2)    | 18.0(5)  |
| C22A | 4207.2(9) | 6394.4(17) | 5064(2)    | 19.9(6)  |
| C25A | 4025.7(8) | 5296.0(15) | 4268(2)    | 17.6(5)  |
| C26A | 4113.3(8) | 4891.4(13) | 5190(2)    | 18.9(5)  |
| C17B | 4106(2)   | 4978(4)    | 6315(6)    | 18.0(5)  |
| C18B | 3985(3)   | 5490(5)    | 6911(7)    | 18.0(5)  |
| C21B | 4211(3)   | 6482(5)    | 6190(6)    | 19.6(16) |
| C22B | 4081(3)   | 6716(5)    | 5144(6)    | 17.5(16) |
| C25B | 4125(3)   | 5591(5)    | 4431(7)    | 18.0(5)  |
| C26B | 3939(2)   | 4908(4)    | 4538(6)    | 18.0(5)  |

**Anisotropic Displacement Parameters ( $\text{\AA}^2 \times 10^3$ ) for SOLUTION 1. The Anisotropic displacement factor exponent takes the form:  $-2\pi^2[h^2a^{*2}U_{11}+2hka^*b^*U_{12}+\dots]$ .**

| Atom | $U_{11}$  | $U_{22}$  | $U_{33}$  | $U_{23}$  | $U_{13}$ | $U_{12}$  |
|------|-----------|-----------|-----------|-----------|----------|-----------|
| Sc1  | 9.48(15)  | 10.01(15) | 11.03(16) | -1.31(12) | 2.72(12) | -1.65(12) |
| Sc2  | 12.46(15) | 10.31(15) | 12.09(17) | 0.45(13)  | 3.80(13) | -0.37(13) |
| Na1  | 17.0(4)   | 11.0(3)   | 13.6(4)   | 0.0(3)    | 3.5(3)   | -1.7(3)   |
| Na2  | 12.6(3)   | 12.2(3)   | 14.9(4)   | -1.9(3)   | 3.8(3)   | -0.3(3)   |
| Na3  | 16.4(4)   | 14.7(3)   | 15.0(4)   | -1.2(3)   | 4.2(3)   | 0.3(3)    |
| N1   | 14.4(7)   | 14.3(7)   | 13.3(8)   | -1.8(6)   | 5.5(6)   | -4.2(6)   |
| N2   | 14.4(7)   | 13.8(7)   | 16.2(8)   | -0.4(6)   | 3.6(6)   | -1.2(6)   |
| N3   | 12.7(7)   | 12.6(7)   | 16.6(8)   | -1.3(6)   | 5.3(6)   | -1.9(6)   |
| N4   | 15.4(8)   | 13.9(8)   | 26.3(9)   | 2.8(7)    | 1.6(7)   | 0.1(6)    |
| N5   | 18.4(8)   | 36.3(10)  | 24.0(10)  | -15.5(8)  | 11.2(8)  | -9.7(8)   |
| N6   | 17.7(8)   | 43.6(11)  | 15.1(9)   | 5.8(8)    | 3.3(7)   | -7.6(8)   |
| O1   | 12.6(6)   | 12.9(6)   | 11.2(6)   | -0.6(5)   | 2.8(5)   | -1.8(5)   |
| O2   | 13.2(6)   | 15.6(6)   | 12.5(6)   | -1.0(5)   | 2.3(5)   | -2.7(5)   |
| O3   | 11.7(6)   | 13.2(6)   | 18.6(7)   | -1.5(5)   | 3.0(5)   | -0.8(5)   |
| O4   | 21.3(7)   | 16.4(7)   | 51.1(11)  | 10.3(7)   | -2.5(7)  | 1.2(6)    |
| O5   | 13.7(6)   | 11.2(6)   | 18.0(7)   | -2.8(5)   | 5.0(5)   | -1.7(5)   |
| O6   | 22.2(7)   | 17.9(7)   | 32.7(9)   | -11.5(6)  | 12.5(7)  | -2.7(6)   |
| O7   | 14.3(6)   | 13.5(6)   | 13.1(6)   | -1.9(5)   | 2.1(5)   | -1.1(5)   |
| O8   | 13.9(6)   | 19.8(7)   | 15.9(7)   | -3.0(5)   | 3.7(5)   | -3.4(5)   |
| O9   | 16.1(6)   | 10.2(6)   | 13.9(6)   | 2.2(5)    | 1.9(5)   | -0.5(5)   |
| O10  | 21.5(7)   | 12.3(6)   | 15.8(7)   | 2.9(5)    | -1.7(6)  | -4.0(5)   |
| O11  | 17.7(6)   | 17.0(6)   | 14.3(7)   | -1.3(5)   | 5.8(5)   | -1.5(5)   |

|      |          |          |          |          |          |          |
|------|----------|----------|----------|----------|----------|----------|
| O12  | 29.4(8)  | 30.6(8)  | 19.5(8)  | -9.6(6)  | 12.5(6)  | -6.5(7)  |
| O13  | 19.7(6)  | 15.1(6)  | 13.7(7)  | 1.4(5)   | 6.4(5)   | -2.4(5)  |
| O14  | 25.7(7)  | 20.4(7)  | 14.5(7)  | 5.0(6)   | 5.2(6)   | -2.0(6)  |
| O15  | 17.7(6)  | 12.3(6)  | 19.7(7)  | 0.0(5)   | 5.5(6)   | 0.0(5)   |
| O16  | 17.4(7)  | 14.1(6)  | 28.6(8)  | 3.6(6)   | 2.8(6)   | -0.6(5)  |
| O17  | 21.1(7)  | 24.0(8)  | 20.0(8)  | -3.0(6)  | 1.9(6)   | 1.9(6)   |
| O18  | 21.3(7)  | 19.0(7)  | 15.6(7)  | -2.3(6)  | 7.4(6)   | -0.4(6)  |
| O19  | 41.0(10) | 39.8(10) | 18.3(8)  | -4.3(7)  | 12.4(7)  | -19.1(8) |
| C1   | 13.3(8)  | 7.0(7)   | 13.7(9)  | 0.1(6)   | 3.6(7)   | 0.1(6)   |
| C2   | 15.2(9)  | 22.5(10) | 12.0(9)  | -2.1(7)  | 3.7(7)   | -5.2(8)  |
| C3   | 19.8(9)  | 18.1(9)  | 16.7(9)  | -2.4(8)  | 8.0(8)   | -0.4(8)  |
| C4   | 14.9(9)  | 21.0(10) | 19.1(10) | -2.0(8)  | 7.3(8)   | 2.0(7)   |
| C5   | 16.8(9)  | 16.6(9)  | 20.5(10) | -1.5(8)  | 3.7(8)   | 0.0(7)   |
| C6   | 12.7(8)  | 16.6(9)  | 19.4(10) | 1.0(7)   | 2.1(8)   | 1.3(7)   |
| C7   | 12.4(8)  | 18.5(9)  | 20.9(10) | -3.5(8)  | 3.9(8)   | -4.8(7)  |
| C8   | 11.9(8)  | 17.4(9)  | 20.7(10) | -0.2(8)  | 5.5(8)   | -3.4(7)  |
| C9   | 16.7(9)  | 13.9(8)  | 14.6(9)  | -2.7(7)  | 3.4(7)   | -0.8(7)  |
| C10  | 14.9(8)  | 13.3(9)  | 21.9(10) | -4.9(7)  | 5.6(8)   | -3.0(7)  |
| C11  | 16.4(9)  | 15.2(9)  | 17.8(10) | 2.0(7)   | 4.7(8)   | -1.1(7)  |
| C12  | 17.8(9)  | 18.3(9)  | 14.6(9)  | 1.9(7)   | 5.9(8)   | -5.2(7)  |
| C13  | 17.7(9)  | 13.6(8)  | 14.0(9)  | -1.6(7)  | 4.0(7)   | 1.2(7)   |
| C14  | 29.2(11) | 28.2(11) | 15.9(10) | -5.9(8)  | 6.2(9)   | -8.3(9)  |
| C15  | 19.6(9)  | 15.0(9)  | 6.3(8)   | 1.7(7)   | 1.5(7)   | 0.2(7)   |
| C16  | 18.6(9)  | 12.3(9)  | 24.3(11) | 0.9(8)   | 5.3(8)   | 0.6(7)   |
| C19  | 20.6(9)  | 15.4(9)  | 17.8(10) | -1.4(7)  | 6.1(8)   | 1.9(8)   |
| C20  | 26.4(11) | 29.4(11) | 24.9(11) | -15.1(9) | 14.2(9)  | -9.0(9)  |
| C23  | 20.1(9)  | 14.4(9)  | 15.4(9)  | 0.8(7)   | 6.8(8)   | 1.0(7)   |
| C24  | 25.1(10) | 33.1(12) | 16.0(10) | 2.7(9)   | 7.3(9)   | -11.7(9) |
| C27  | 20.1(9)  | 13.2(8)  | 14.5(9)  | -0.2(7)  | 4.4(8)   | 1.6(7)   |
| C28  | 25.0(10) | 14.4(9)  | 22.9(11) | 1.0(8)   | 3.8(9)   | 3.5(8)   |
| C17A | 19.1(12) | 16.4(12) | 13.3(12) | 1.3(10)  | 1.7(10)  | -0.2(10) |
| C18A | 12.9(12) | 23.4(14) | 15.6(13) | -4.1(11) | 0.8(10)  | -2.0(11) |
| C21A | 16.8(11) | 17.6(12) | 19.3(13) | -0.9(10) | 4.9(10)  | -4.3(9)  |
| C22A | 21.1(14) | 19.6(15) | 21.8(15) | -3.1(12) | 10.4(12) | -5.9(12) |
| C25A | 16.3(13) | 18.6(13) | 19.8(14) | -4.6(11) | 8.5(11)  | 1.0(11)  |
| C26A | 16.2(12) | 17.9(12) | 23.5(15) | -3.6(11) | 7.3(11)  | 1.8(10)  |
| C17B | 16.8(11) | 17.6(12) | 19.3(13) | -0.9(10) | 4.9(10)  | -4.3(9)  |
| C18B | 16.8(11) | 17.6(12) | 19.3(13) | -0.9(10) | 4.9(10)  | -4.3(9)  |
| C21B | 21(4)    | 20(4)    | 17(4)    | -3(3)    | 6(3)     | -5(3)    |
| C22B | 20(4)    | 16(4)    | 14(4)    | -5(3)    | 2(3)     | -14(3)   |
| C25B | 16.8(11) | 17.6(12) | 19.3(13) | -0.9(10) | 4.9(10)  | -4.3(9)  |
| C26B | 16.8(11) | 17.6(12) | 19.3(13) | -0.9(10) | 4.9(10)  | -4.3(9)  |

**Table 4 Bond Lengths for SOLUTION 1.**

| Atom | Atom             | Length/Å   | Atom | Atom | Length/Å  |
|------|------------------|------------|------|------|-----------|
| Sc1  | N1               | 2.3834(16) | N4   | C26A | 1.446(3)  |
| Sc1  | N2               | 2.3738(16) | N4   | C17B | 1.407(8)  |
| Sc1  | N3               | 2.3932(15) | N4   | C26B | 1.707(8)  |
| Sc1  | O1               | 2.1163(13) | N5   | C20  | 1.475(3)  |
| Sc1  | O3               | 2.1652(13) | N5   | C18A | 1.427(3)  |
| Sc1  | O5               | 2.1551(13) | N5   | C21A | 1.540(3)  |
| Sc1  | O7               | 2.3765(13) | N5   | C18B | 1.792(10) |
| Sc1  | O8               | 2.2129(14) | N5   | C21B | 1.431(8)  |
| Sc2  | N4               | 2.3762(16) | N6   | C24  | 1.475(3)  |
| Sc2  | N5               | 2.3684(18) | N6   | C22A | 1.449(3)  |
| Sc2  | N6               | 2.4364(17) | N6   | C25A | 1.565(3)  |
| Sc2  | O9               | 2.1314(13) | N6   | C22B | 1.743(8)  |
| Sc2  | O11              | 2.1580(13) | N6   | C25B | 1.219(9)  |
| Sc2  | O13              | 2.1576(14) | O1   | C1   | 1.294(2)  |
| Sc2  | O15              | 2.3275(13) | O2   | C1   | 1.229(2)  |
| Sc2  | O16              | 2.1802(14) | O3   | C5   | 1.281(2)  |
| Na1  | O1               | 2.3569(14) | O4   | C5   | 1.237(2)  |
| Na1  | O2 <sup>1</sup>  | 2.4041(14) | O5   | C9   | 1.281(2)  |
| Na1  | O3               | 2.5567(14) | O6   | C9   | 1.234(2)  |
| Na1  | O7               | 2.4281(14) | O7   | C13  | 1.258(2)  |
| Na1  | O10 <sup>2</sup> | 2.3099(15) | O8   | C13  | 1.283(2)  |
| Na1  | O14              | 2.2309(15) | O9   | C15  | 1.272(2)  |
| Na1  | C15 <sup>2</sup> | 3.1223(19) | O10  | C15  | 1.240(2)  |
| Na2  | O1               | 2.4782(14) | O11  | C19  | 1.285(2)  |
| Na2  | O2 <sup>1</sup>  | 2.4244(14) | O12  | C19  | 1.233(2)  |
| Na2  | O5               | 2.3894(14) | O13  | C23  | 1.274(2)  |
| Na2  | O7               | 2.4042(14) | O14  | C23  | 1.234(2)  |
| Na2  | O10 <sup>3</sup> | 2.2422(15) | O15  | C27  | 1.262(2)  |
| Na2  | O18              | 2.2808(15) | O16  | C27  | 1.278(2)  |
| Na3  | O6               | 2.3294(15) | C1   | C2   | 1.509(2)  |
| Na3  | O9 <sup>3</sup>  | 2.4583(15) | C3   | C4   | 1.522(3)  |
| Na3  | O13 <sup>3</sup> | 2.4245(15) | C5   | C6   | 1.517(3)  |
| Na3  | O15 <sup>3</sup> | 2.4704(15) | C7   | C8   | 1.514(3)  |
| Na3  | O17              | 2.4036(17) | C9   | C10  | 1.525(3)  |
| Na3  | O18              | 2.3785(16) | C11  | C12  | 1.511(3)  |
| N1   | C2               | 1.498(2)   | C13  | C14  | 1.497(3)  |
| N1   | C3               | 1.490(2)   | C15  | C16  | 1.507(3)  |
| N1   | C12              | 1.508(2)   | C19  | C20  | 1.510(3)  |



|    |      |          |      |      |           |
|----|------|----------|------|------|-----------|
| N2 | C4   | 1.504(2) | C23  | C24  | 1.518(3)  |
| N2 | C6   | 1.477(2) | C27  | C28  | 1.497(3)  |
| N2 | C7   | 1.490(2) | C17A | C18A | 1.526(4)  |
| N3 | C8   | 1.495(2) | C21A | C22A | 1.516(4)  |
| N3 | C10  | 1.478(2) | C25A | C26A | 1.507(4)  |
| N3 | C11  | 1.491(2) | C17B | C18B | 1.475(12) |
| N4 | C16  | 1.480(2) | C21B | C22B | 1.515(12) |
| N4 | C17A | 1.545(3) | C25B | C26B | 1.525(11) |

<sup>1</sup>/2-X,<sup>3</sup>/2-Y,-Z; <sup>2</sup>+X,1-Y,-1/2+Z; <sup>3</sup>/2-X,1/2+Y,1/2-Z

### Bond Angles for SOLUTION 1.

| Atom | Atom | Atom | Angle/°   | Atom | Atom | Atom | Angle/°    |
|------|------|------|-----------|------|------|------|------------|
| N1   | Sc1  | N3   | 74.20(5)  | C11  | N3   | C8   | 110.96(14) |
| N2   | Sc1  | N1   | 75.71(5)  | C16  | N4   | Sc2  | 109.40(11) |
| N2   | Sc1  | N3   | 70.91(5)  | C16  | N4   | C17A | 107.69(16) |
| N2   | Sc1  | O7   | 125.84(5) | C16  | N4   | C26B | 98.6(3)    |
| O1   | Sc1  | N1   | 73.10(5)  | C17A | N4   | Sc2  | 97.65(12)  |
| O1   | Sc1  | N2   | 137.09(5) | C26A | N4   | Sc2  | 118.94(14) |
| O1   | Sc1  | N3   | 125.69(5) | C26A | N4   | C16  | 111.53(17) |
| O1   | Sc1  | O3   | 82.23(5)  | C26A | N4   | C17A | 110.37(18) |
| O1   | Sc1  | O5   | 79.79(5)  | C17B | N4   | Sc2  | 121.1(3)   |
| O1   | Sc1  | O7   | 74.31(5)  | C17B | N4   | C16  | 120.2(3)   |
| O1   | Sc1  | O8   | 130.90(5) | C17B | N4   | C26B | 104.3(4)   |
| O3   | Sc1  | N1   | 93.60(5)  | C26B | N4   | Sc2  | 97.4(3)    |
| O3   | Sc1  | N2   | 71.06(5)  | C20  | N5   | Sc2  | 106.28(12) |
| O3   | Sc1  | N3   | 141.85(5) | C20  | N5   | C21A | 107.03(18) |
| O3   | Sc1  | O7   | 73.69(5)  | C20  | N5   | C18B | 106.7(3)   |
| O3   | Sc1  | O8   | 88.14(5)  | C18A | N5   | Sc2  | 111.30(15) |
| O5   | Sc1  | N1   | 107.78(5) | C18A | N5   | C20  | 109.90(19) |
| O5   | Sc1  | N2   | 138.44(5) | C18A | N5   | C21A | 114.7(2)   |
| O5   | Sc1  | N3   | 70.56(5)  | C21A | N5   | Sc2  | 107.25(15) |
| O5   | Sc1  | O3   | 146.44(5) | C18B | N5   | Sc2  | 96.8(3)    |
| O5   | Sc1  | O7   | 74.27(5)  | C21B | N5   | Sc2  | 125.0(4)   |
| O5   | Sc1  | O8   | 82.63(5)  | C21B | N5   | C20  | 118.5(4)   |
| O7   | Sc1  | N1   | 146.32(5) | C21B | N5   | C18B | 99.1(5)    |
| O7   | Sc1  | N3   | 133.95(5) | C24  | N6   | Sc2  | 103.89(12) |
| O8   | Sc1  | N1   | 155.85(5) | C24  | N6   | C25A | 108.52(18) |
| O8   | Sc1  | N2   | 82.15(5)  | C24  | N6   | C22B | 101.5(3)   |
| O8   | Sc1  | N3   | 89.65(5)  | C22A | N6   | Sc2  | 116.97(16) |
| O8   | Sc1  | O7   | 56.82(5)  | C22A | N6   | C24  | 113.70(19) |
| N4   | Sc2  | N6   | 71.08(6)  | C22A | N6   | C25A | 108.6(2)   |

|                  |     |                  |           |                      |                  |            |
|------------------|-----|------------------|-----------|----------------------|------------------|------------|
| N5               | Sc2 | N4               | 75.03(6)  | C25A N6              | Sc2              | 104.57(14) |
| N5               | Sc2 | N6               | 70.52(6)  | C22B N6              | Sc2              | 99.3(3)    |
| O9               | Sc2 | N4               | 73.95(5)  | C25B N6              | Sc2              | 123.6(4)   |
| O9               | Sc2 | N5               | 133.46(6) | C25B N6              | C24              | 113.4(5)   |
| O9               | Sc2 | N6               | 128.07(6) | C25B N6              | C22B             | 112.3(6)   |
| O9               | Sc2 | O11              | 81.34(5)  | Sc1 O1               | Na1              | 98.59(5)   |
| O9               | Sc2 | O13              | 78.58(5)  | Sc1 O1               | Na2              | 94.81(5)   |
| O9               | Sc2 | O15              | 78.01(5)  | Na1 O1               | Na2              | 82.06(5)   |
| O9               | Sc2 | O16              | 135.87(5) | C1 O1                | Sc1              | 126.36(11) |
| O11              | Sc2 | N4               | 100.46(6) | C1 O1                | Na1              | 117.31(11) |
| O11              | Sc2 | N5               | 71.20(5)  | C1 O1                | Na2              | 126.77(11) |
| O11              | Sc2 | N6               | 141.69(6) | Na1 <sup>1</sup> O2  | Na2 <sup>1</sup> | 82.24(4)   |
| O11              | Sc2 | O15              | 78.54(5)  | C1 O2                | Na1 <sup>1</sup> | 129.90(12) |
| O11              | Sc2 | O16              | 91.26(5)  | C1 O2                | Na2 <sup>1</sup> | 129.37(12) |
| O13              | Sc2 | N4               | 96.50(6)  | Sc1 O3               | Na1              | 91.55(5)   |
| O13              | Sc2 | N5               | 138.93(6) | C5 O3                | Sc1              | 121.32(12) |
| O13              | Sc2 | N6               | 68.76(6)  | C5 O3                | Na1              | 140.40(12) |
| O13              | Sc2 | O11              | 148.91(5) | Sc1 O5               | Na2              | 96.38(5)   |
| O13              | Sc2 | O15              | 74.26(5)  | C9 O5                | Sc1              | 121.55(11) |
| O13              | Sc2 | O16              | 86.92(5)  | C9 O5                | Na2              | 138.02(12) |
| O15              | Sc2 | N4               | 151.73(5) | C9 O6                | Na3              | 129.80(13) |
| O15              | Sc2 | N5               | 129.26(6) | Sc1 O7               | Na1              | 89.90(5)   |
| O15              | Sc2 | N6               | 126.44(6) | Sc1 O7               | Na2              | 90.36(5)   |
| O16              | Sc2 | N4               | 149.70(6) | Na2 O7               | Na1              | 82.16(5)   |
| O16              | Sc2 | N5               | 82.66(6)  | C13 O7               | Sc1              | 88.64(11)  |
| O16              | Sc2 | N6               | 82.38(6)  | C13 O7               | Na1              | 148.50(12) |
| O16              | Sc2 | O15              | 57.91(5)  | C13 O7               | Na2              | 129.31(12) |
| O1               | Na1 | O2 <sup>1</sup>  | 89.04(5)  | C13 O8               | Sc1              | 95.52(11)  |
| O1               | Na1 | O3               | 69.78(5)  | Sc2 O9               | Na3 <sup>4</sup> | 95.32(5)   |
| O1               | Na1 | O7               | 69.31(5)  | C15 O9               | Sc2              | 124.10(12) |
| O1               | Na1 | C15 <sup>2</sup> | 110.98(5) | C15 O9               | Na3 <sup>4</sup> | 121.63(11) |
| O2 <sup>1</sup>  | Na1 | O3               | 149.69(5) | Na2 <sup>4</sup> O10 | Na1 <sup>5</sup> | 108.02(6)  |
| O2 <sup>1</sup>  | Na1 | O7               | 86.33(5)  | C15 O10              | Na1 <sup>5</sup> | 120.12(12) |
| O2 <sup>1</sup>  | Na1 | C15 <sup>2</sup> | 115.92(5) | C15 O10              | Na2 <sup>4</sup> | 131.57(12) |
| O3               | Na1 | C15 <sup>2</sup> | 92.39(5)  | C19 O11              | Sc2              | 122.80(12) |
| O7               | Na1 | O3               | 66.32(4)  | Sc2 O13              | Na3 <sup>4</sup> | 95.62(5)   |
| O7               | Na1 | C15 <sup>2</sup> | 157.64(5) | C23 O13              | Sc2              | 119.18(12) |
| O10 <sup>2</sup> | Na1 | O1               | 98.21(5)  | C23 O13              | Na3 <sup>4</sup> | 132.78(12) |
| O10 <sup>2</sup> | Na1 | O2 <sup>1</sup>  | 101.44(5) | C23 O14              | Na1              | 135.25(13) |
| O10 <sup>2</sup> | Na1 | O3               | 102.82(5) | Sc2 O15              | Na3 <sup>4</sup> | 90.19(5)   |
| O10 <sup>2</sup> | Na1 | O7               | 165.39(6) | C27 O15              | Sc2              | 88.49(11)  |
| O10 <sup>2</sup> | Na1 | C15 <sup>2</sup> | 20.09(5)  | C27 O15              | Na3 <sup>4</sup> | 137.58(12) |

|                  |     |                  |            |      |      |                  |            |
|------------------|-----|------------------|------------|------|------|------------------|------------|
| O14              | Na1 | O1               | 174.27(6)  | C27  | O16  | Sc2              | 94.82(11)  |
| O14              | Na1 | O2 <sup>1</sup>  | 96.63(5)   | Na2  | O18  | Na3              | 102.40(6)  |
| O14              | Na1 | O3               | 104.64(5)  | O1   | C1   | C2               | 116.07(15) |
| O14              | Na1 | O7               | 110.07(6)  | O2   | C1   | O1               | 124.20(16) |
| O14              | Na1 | O10 <sup>2</sup> | 81.55(5)   | O2   | C1   | C2               | 119.73(16) |
| O14              | Na1 | C15 <sup>2</sup> | 67.27(5)   | N1   | C2   | C1               | 113.72(15) |
| O2 <sup>1</sup>  | Na2 | O1               | 85.83(5)   | N1   | C3   | C4               | 112.61(15) |
| O5               | Na2 | O1               | 68.48(5)   | N2   | C4   | C3               | 113.39(15) |
| O5               | Na2 | O2 <sup>1</sup>  | 149.87(5)  | O3   | C5   | C6               | 115.61(16) |
| O5               | Na2 | O7               | 69.77(5)   | O4   | C5   | O3               | 125.41(18) |
| O7               | Na2 | O1               | 67.74(5)   | O4   | C5   | C6               | 118.91(17) |
| O7               | Na2 | O2 <sup>1</sup>  | 86.41(5)   | N2   | C6   | C5               | 110.76(15) |
| O10 <sup>3</sup> | Na2 | O1               | 101.60(5)  | N2   | C7   | C8               | 110.03(15) |
| O10 <sup>3</sup> | Na2 | O2 <sup>1</sup>  | 90.65(5)   | N3   | C8   | C7               | 109.86(15) |
| O10 <sup>3</sup> | Na2 | O5               | 109.21(6)  | O5   | C9   | C10              | 115.62(16) |
| O10 <sup>3</sup> | Na2 | O7               | 169.10(6)  | O6   | C9   | O5               | 125.11(17) |
| O10 <sup>3</sup> | Na2 | O18              | 91.03(6)   | O6   | C9   | C10              | 119.23(16) |
| O18              | Na2 | O1               | 162.40(6)  | N3   | C10  | C9               | 110.65(15) |
| O18              | Na2 | O2 <sup>1</sup>  | 106.43(5)  | N3   | C11  | C12              | 111.84(15) |
| O18              | Na2 | O5               | 95.93(5)   | N1   | C12  | C11              | 111.55(15) |
| O18              | Na2 | O7               | 99.86(5)   | O7   | C13  | O8               | 118.90(17) |
| O6               | Na3 | O9 <sup>3</sup>  | 108.10(6)  | O7   | C13  | C14              | 121.21(17) |
| O6               | Na3 | O13 <sup>3</sup> | 157.63(6)  | O8   | C13  | C14              | 119.86(17) |
| O6               | Na3 | O15 <sup>3</sup> | 90.53(5)   | O9   | C15  | Na1 <sup>5</sup> | 144.94(13) |
| O6               | Na3 | O17              | 102.10(6)  | O9   | C15  | C16              | 117.38(16) |
| O6               | Na3 | O18              | 96.98(6)   | O10  | C15  | Na1 <sup>5</sup> | 39.79(9)   |
| O9 <sup>3</sup>  | Na3 | O15 <sup>3</sup> | 69.54(5)   | O10  | C15  | O9               | 125.34(17) |
| O13 <sup>3</sup> | Na3 | O9 <sup>3</sup>  | 67.59(5)   | O10  | C15  | C16              | 117.23(16) |
| O13 <sup>3</sup> | Na3 | O15 <sup>3</sup> | 67.25(5)   | C16  | C15  | Na1 <sup>5</sup> | 87.93(11)  |
| O17              | Na3 | O9 <sup>3</sup>  | 149.64(6)  | N4   | C16  | C15              | 114.41(15) |
| O17              | Na3 | O13 <sup>3</sup> | 83.28(5)   | O11  | C19  | C20              | 114.87(17) |
| O17              | Na3 | O15 <sup>3</sup> | 107.74(6)  | O12  | C19  | O11              | 125.78(18) |
| O18              | Na3 | O9 <sup>3</sup>  | 92.52(5)   | O12  | C19  | C20              | 119.31(18) |
| O18              | Na3 | O13 <sup>3</sup> | 105.05(5)  | N5   | C20  | C19              | 109.39(16) |
| O18              | Na3 | O15 <sup>3</sup> | 161.98(6)  | O13  | C23  | C24              | 116.46(17) |
| O18              | Na3 | O17              | 86.74(6)   | O14  | C23  | O13              | 124.67(18) |
| C2               | N1  | Sc1              | 110.69(11) | O14  | C23  | C24              | 118.86(17) |
| C2               | N1  | C12              | 111.20(15) | N6   | C24  | C23              | 109.36(16) |
| C3               | N1  | Sc1              | 102.35(11) | O15  | C27  | O16              | 118.75(17) |
| C3               | N1  | C2               | 109.58(14) | O15  | C27  | C28              | 121.53(17) |
| C3               | N1  | C12              | 110.74(14) | O16  | C27  | C28              | 119.68(17) |
| C12              | N1  | Sc1              | 111.94(11) | C18A | C17A | N4               | 111.0(2)   |

|     |    |     |            |            |          |          |
|-----|----|-----|------------|------------|----------|----------|
| C4  | N2 | Sc1 | 110.24(11) | N5         | C18AC17A | 112.7(2) |
| C6  | N2 | Sc1 | 105.79(11) | C22AC21AN5 | 110.1(2) |          |
| C6  | N2 | C4  | 110.24(15) | N6         | C22AC21A | 109.2(2) |
| C6  | N2 | C7  | 109.51(15) | C26AC25AN6 | 109.9(2) |          |
| C7  | N2 | Sc1 | 109.34(11) | N4         | C26AC25A | 108.1(2) |
| C7  | N2 | C4  | 111.56(15) | N4         | C17BC18B | 103.0(6) |
| C8  | N3 | Sc1 | 116.19(11) | C17BC18BN5 | 112.3(7) |          |
| C10 | N3 | Sc1 | 106.01(11) | N5         | C21BC22B | 99.9(7)  |
| C10 | N3 | C8  | 110.30(14) | C21BC22BN6 | 107.5(6) |          |
| C10 | N3 | C11 | 109.40(15) | N6         | C25BC26B | 106.5(7) |
| C11 | N3 | Sc1 | 103.59(10) | C25BC26BN4 | 111.1(6) |          |

<sup>1</sup>1/2-X,3/2-Y,-Z; <sup>2</sup>+X,1-Y,-1/2+Z; <sup>3</sup>1/2-X,1/2+Y,1/2-Z; <sup>4</sup>1/2-X,-1/2+Y,1/2-Z; <sup>5</sup>+X,1-Y,1/2+Z

### Torsion Angles for SOLUTION 1.

| A   | B  | C        | D   | Angle/°    | A                | B          | C   | D   | Angle/°    |
|-----|----|----------|-----|------------|------------------|------------|-----|-----|------------|
| Sc1 | N1 | C2       | C1  | -0.68(19)  | Na3 <sup>3</sup> | O15        | C27 | C28 | 87.6(2)    |
| Sc1 | N1 | C3       | C4  | -55.46(16) | N1               | C3         | C4  | N2  | 48.3(2)    |
| Sc1 | N1 | C12      | C11 | -16.53(18) | N2               | C7         | C8  | N3  | 46.7(2)    |
| Sc1 | N2 | C4       | C3  | -12.54(19) | N3               | C11        | C12 | N1  | 51.1(2)    |
| Sc1 | N2 | C6       | C5  | 38.12(17)  | N4               | C17AC18AN5 |     |     | 51.2(3)    |
| Sc1 | N2 | C7       | C8  | -54.21(17) | N4               | C17BC18BN5 |     |     | -58.2(7)   |
| Sc1 | N3 | C8       | C7  | -17.17(19) | N5               | C21AC22AN6 |     |     | 48.6(3)    |
| Sc1 | N3 | C10      | C9  | -35.94(17) | N5               | C21BC22BN6 |     |     | -61.0(7)   |
| Sc1 | N3 | C11      | C12 | -56.74(16) | N6               | C25AC26AN4 |     |     | 53.2(3)    |
| Sc1 | O1 | C1       | O2  | 177.05(13) | N6               | C25BC26BN4 |     |     | -52.6(8)   |
| Sc1 | O1 | C1       | C2  | 3.1(2)     | O1               | C1         | C2  | N1  | -1.2(2)    |
| Sc1 | O3 | C5       | O4  | 164.55(17) | O2               | C1         | C2  | N1  | 178.89(16) |
| Sc1 | O3 | C5       | C6  | -12.3(2)   | O3               | C5         | C6  | N2  | -20.6(2)   |
| Sc1 | O5 | C9       | O6  | 159.96(16) | O4               | C5         | C6  | N2  | 162.26(19) |
| Sc1 | O5 | C9       | C10 | 17.7(2)    | O5               | C9         | C10 | N3  | 16.2(2)    |
| Sc1 | O7 | C13      | O8  | -3.51(17)  | O6               | C9         | C10 | N3  | 166.06(17) |
| Sc1 | O7 | C13      | C14 | 174.46(17) | O9               | C15        | C16 | N4  | 8.5(3)     |
| Sc1 | O8 | C13      | O7  | 3.78(18)   | O10              | C15        | C16 | N4  | 174.13(17) |
| Sc1 | O8 | C13      | C14 | 174.21(16) | O11              | C19        | C20 | N5  | -31.1(3)   |
| Sc2 | N4 | C16      | C15 | -9.5(2)    | O12              | C19        | C20 | N5  | 151.04(19) |
| Sc2 | N4 | C17AC18A |     | -60.86(19) | O13              | C23        | C24 | N6  | 13.7(3)    |
| Sc2 | N4 | C26AC25A |     | -23.6(3)   | O14              | C23        | C24 | N6  | 167.00(18) |

|                             |            |                  |            |
|-----------------------------|------------|------------------|------------|
| Sc2 N4 C17B C18B            | 27.5(7)    | C2 N1 C3 C4      | 172.95(15) |
| Sc2 N4 C26B C25B            | 59.3(6)    | C2 N1 C12 C11    | 107.86(17) |
| Sc2 N5 C20 C19              | 41.4(2)    | C3 N1 C2 C1      | 111.47(17) |
| Sc2 N5 C18A C17A            | -10.0(3)   | C3 N1 C12 C11    | 130.05(16) |
| Sc2 N5 C21A C22A            | -56.7(3)   | C4 N2 C6 C5      | -81.04(18) |
| Sc2 N5 C18B C17B            | 59.7(6)    | C4 N2 C7 C8      | 67.98(19)  |
| Sc2 N5 C21B C22B            | 31.3(8)    | C6 N2 C4 C3      | 103.88(18) |
| Sc2 N6 C24 C23              | -39.14(19) | C6 N2 C7 C8      | 169.70(15) |
| Sc2 N6 C22A C21A            | -17.4(3)   | C7 N2 C4 C3      | 134.21(17) |
| Sc2 N6 C25A C26A            | -55.9(2)   | C7 N2 C6 C5      | 155.85(15) |
| Sc2 N6 C22B C21B            | 64.1(7)    | C8 N3 C10 C9     | 162.51(15) |
| Sc2 N6 C25B C26B            | 17.4(9)    | C8 N3 C11 C12    | 68.63(19)  |
| Sc2 O9 C15 Na1 <sup>1</sup> | 129.52(17) | C10 N3 C8 C7     | 103.48(18) |
| Sc2 O9 C15 O10              | 179.48(14) | C10 N3 C11 C12   | 169.45(15) |
| Sc2 O9 C15 C16              | -2.3(2)    | C11 N3 C8 C7     | 135.13(16) |
| Sc2 O11 C19 O12             | 179.16(16) | C11 N3 C10 C9    | 75.17(19)  |
| Sc2 O11 C19 C20             | 1.4(2)     | C12 N1 C2 C1     | 125.76(16) |
| Sc2 O13 C23 O14             | 152.57(16) | C12 N1 C3 C4     | 64.0(2)    |
| Sc2 O13 C23 C24             | 26.7(2)    | C16 N4 C17A C18A | 174.09(18) |
| Sc2 O15 C27 O16             | -1.61(18)  | C16 N4 C26A C25A | 105.2(2)   |
| Sc2 O15 C27 C28             | 176.24(17) | C16 N4 C17B C18B | -115.5(5)  |
| Sc2 O16 C27 O15             | 1.73(19)   | C16 N4 C26B C25B | 170.3(6)   |
| Sc2 O16 C27 C28             | 176.16(16) | C20 N5 C18A C17A | 107.4(2)   |
| Na1 O1 C1 O2                | 56.9(2)    | C20 N5 C21A C22A | -170.4(2)  |
| Na1 O1 C1 C2                | 123.01(14) | C20 N5 C18B C17B | 169.0(6)   |
| Na1 <sup>2</sup> O2 C1 O1   | 49.5(2)    | C20 N5 C21B C22B | -109.1(6)  |
| Na1 <sup>2</sup> O2 C1 C2   | 130.62(15) | C24 N6 C22A C21A | 103.8(3)   |
| Na1 O3 C5 O4                | 22.8(3)    | C24 N6 C25A C26A | 166.31(19) |
| Na1 O3 C5 C6                | 154.08(14) | C24 N6 C22B C21B | 170.4(6)   |
| Na1 O7 C13 O8               | 84.1(3)    | C24 N6 C25B C26B | -109.6(6)  |
| Na1 O7 C13 C14              | -98.0(3)   | C17A N4 C16 C15  | 95.6(2)    |

|                         |                  |            |        |          |            |
|-------------------------|------------------|------------|--------|----------|------------|
| Na1 <sup>1</sup> O10C15 | O9               | 135.77(16) | C17AN4 | C26AC25A | -135.2(2)  |
| Na1 <sup>1</sup> O10C15 | C16              | 47.1(2)    | C18AN5 | C20 C19  | -79.1(2)   |
| Na1 <sup>1</sup> O14C23 | O13              | 138.94(16) | C18AN5 | C21AC22A | 67.4(3)    |
| Na1 <sup>1</sup> O14C23 | C24              | -40.3(3)   | C21AN5 | C20 C19  | 155.8(2)   |
| Na1 <sup>1</sup> C15C16 | N4               | 146.18(15) | C21AN5 | C18AC17A | -132.0(2)  |
| Na2 <sup>2</sup> O1 C1  | O2               | -44.2(2)   | C22AN6 | C24 C23  | -167.4(2)  |
| Na2 <sup>2</sup> O1 C1  | C2               | 135.92(13) | C22AN6 | C25AC26A | 69.7(3)    |
| Na2 <sup>2</sup> O2 C1  | O1               | -67.8(2)   | C25AN6 | C24 C23  | 71.7(2)    |
| Na2 <sup>2</sup> O2 C1  | C2               | 112.10(17) | C25AN6 | C22AC21A | -135.3(2)  |
| Na2 <sup>2</sup> O5 C9  | O6               | -8.6(3)    | C26AN4 | C16 C15  | 143.19(19) |
| Na2 <sup>2</sup> O5 C9  | C10              | 169.02(13) | C26AN4 | C17AC18A | 63.9(2)    |
| Na2 <sup>2</sup> O7 C13 | O8               | -92.85(19) | C17BN4 | C16 C15  | 137.4(4)   |
| Na2 <sup>2</sup> O7 C13 | C14              | 85.1(2)    | C17BN4 | C26BC25B | -65.5(7)   |
| Na2 <sup>3</sup> O10C15 | Na1 <sup>1</sup> | 172.9(2)   | C18BN5 | C20 C19  | -61.0(4)   |
| Na2 <sup>3</sup> O10C15 | O9               | 37.2(3)    | C18BN5 | C21BC22B | 136.2(6)   |
| Na2 <sup>3</sup> O10C15 | C16              | 140.02(15) | C21BN5 | C20 C19  | -171.5(5)  |
| Na3 <sup>3</sup> O6 C9  | O5               | -9.8(3)    | C21BN5 | C18BC17B | -67.5(7)   |
| Na3 <sup>3</sup> O6 C9  | C10              | 172.61(13) | C22BN6 | C24 C23  | -141.8(4)  |
| Na3 <sup>3</sup> O9 C15 | Na1 <sup>1</sup> | 107.21(19) | C22BN6 | C25BC26B | 136.1(6)   |
| Na3 <sup>3</sup> O9 C15 | O10              | -56.2(2)   | C25BN6 | C24 C23  | 97.6(5)    |
| Na3 <sup>3</sup> O9 C15 | C16              | 120.96(15) | C25BN6 | C22BC21B | -68.2(8)   |
| Na3 <sup>3</sup> O13C23 | O14              | -20.5(3)   | C26BN4 | C16 C15  | -110.5(3)  |
| Na3 <sup>3</sup> O13C23 | C24              | 158.73(14) | C26BN4 | C17BC18B | 135.4(6)   |
| Na3 <sup>3</sup> O15C27 | O16              | -90.2(2)   |        |          |            |

<sup>1</sup>X,1-Y,1/2+Z; <sup>2</sup>1/2-X,3/2-Y,-Z; <sup>3</sup>1/2-X,-1/2+Y,1/2-Z

### Hydrogen Atom Coordinates ( $\text{\AA}\times 10^4$ ) and Isotropic Displacement Parameters ( $\text{\AA}^2\times 10^3$ ) for SOLUTION 1.

| Atom | x       | y       | z        | U(eq) |
|------|---------|---------|----------|-------|
| H2A  | 3247.27 | 7650.54 | -1716.9  | 20    |
| H2B  | 3062.58 | 8397.66 | -1873.65 | 20    |
| H3A  | 3945.35 | 7809.21 | -1396.09 | 21    |
| H3B  | 3843.94 | 7398.9  | -548.96  | 21    |
| H4A  | 4513.05 | 7680.7  | 44.27    | 21    |
| H4B  | 4427.75 | 8447.87 | -312.08  | 21    |
| H6A  | 4539.31 | 7901.45 | 2319.39  | 20    |
| H6B  | 4699.21 | 7514.45 | 1538.78  | 20    |
| H7A  | 4797.7  | 8858.77 | 1267.43  | 21    |

|      |         |          |          |    |
|------|---------|----------|----------|----|
| H7B  | 4533.77 | 8977.97  | 1982.45  | 21 |
| H8A  | 4421.45 | 9919.49  | 999.94   | 20 |
| H8B  | 4357.63 | 9470.51  | 43.16    | 20 |
| H10A | 3750.95 | 10418.51 | 887.75   | 20 |
| H10B | 3963.46 | 9962.73  | 1818.56  | 20 |
| H11A | 3726.06 | 10015.34 | -701.85  | 20 |
| H11B | 3345.5  | 9644.29  | -535.13  | 20 |
| H12A | 3484.52 | 9091.51  | -1798.41 | 20 |
| H12B | 3950.36 | 9019.14  | -1192.89 | 20 |
| H14A | 3898.41 | 8282.13  | 4180.07  | 37 |
| H14B | 3453.87 | 7973.73  | 3888.96  | 37 |
| H14C | 3517.13 | 8776.12  | 3885     | 37 |
| H16A | 3628.18 | 3978.1   | 5915.23  | 22 |
| H16B | 3614.5  | 4013.52  | 4805.15  | 22 |
| H20A | 3560.99 | 7125.1   | 6551.3   | 31 |
| H20B | 3840.66 | 6762.6   | 7512.35  | 31 |
| H24A | 3885.42 | 6294.46  | 3080.88  | 29 |
| H24B | 3655.3  | 6829.36  | 3554.11  | 29 |
| H28A | 2643.37 | 7811.37  | 4212.68  | 32 |
| H28B | 2264.95 | 7319.35  | 3809.09  | 32 |
| H28C | 2554.36 | 7470.75  | 3166.74  | 32 |
| H17C | 3638.07 | 5018.94  | 6826.19  | 20 |
| H17D | 4072.61 | 4697.69  | 6959.49  | 20 |
| H18C | 4109.48 | 5845.19  | 7542.42  | 22 |
| H18D | 4337.83 | 5743.29  | 6750.86  | 22 |
| H21A | 3889.24 | 7143.65  | 5510.49  | 22 |
| H21B | 4299.37 | 6945.27  | 6328.36  | 22 |
| H22A | 4309.82 | 6725.85  | 4685.56  | 24 |
| H22B | 4428.36 | 6080.06  | 5387.17  | 24 |
| H25A | 3818.14 | 5062.38  | 3742.32  | 21 |
| H25B | 4272.46 | 5333.77  | 4072.23  | 21 |
| H26A | 4178.98 | 4417.83  | 5072.52  | 23 |
| H26B | 4345.95 | 5088     | 5692.94  | 23 |
| H17E | 4337.71 | 5137.62  | 6116.85  | 22 |
| H17F | 4177.15 | 4544.76  | 6668.11  | 22 |
| H18E | 4212.91 | 5578.84  | 7501.09  | 22 |
| H18F | 3759.75 | 5309.08  | 7116.81  | 22 |
| H21C | 4405.04 | 6102.61  | 6298.6   | 24 |
| H21D | 4329.37 | 6856.53  | 6641.59  | 24 |
| H22C | 4314.3  | 6891.75  | 4968.88  | 21 |
| H22D | 3878.64 | 7081.84  | 5048.38  | 21 |
| H25C | 4372.75 | 5667.54  | 4979.24  | 22 |

|      |          |           |          |    |
|------|----------|-----------|----------|----|
| H25D | 4195.53  | 5605.6    | 3819.94  | 22 |
| H26C | 4143.53  | 4547.94   | 4622.57  | 22 |
| H26D | 3716.17  | 4808.86   | 3941.26  | 22 |
| H18A | 2272(7)  | 8947(18)  | 2310(30) | 80 |
| H17A | 2379(7)  | 10776(17) | 3340(30) | 80 |
| H18B | 2667(11) | 9103(19)  | 2890(30) | 80 |
| H17B | 2650(11) | 10269(19) | 3750(30) | 80 |
| H19A | 2529(6)  | 9215(18)  | 4390(30) | 80 |
| H19B | 2948(10) | 9039(17)  | 4915(19) | 80 |

### Atomic Occupancy for SOLUTION 1.

| Atom | Occupancy | Atom | Occupancy | Atom | Occupancy |
|------|-----------|------|-----------|------|-----------|
| C17A | 0.75      | H17C | 0.75      | H17D | 0.75      |
| C18A | 0.75      | H18C | 0.75      | H18D | 0.75      |
| C21A | 0.75      | H21A | 0.75      | H21B | 0.75      |
| C22A | 0.75      | H22A | 0.75      | H22B | 0.75      |
| C25A | 0.75      | H25A | 0.75      | H25B | 0.75      |
| C26A | 0.75      | H26A | 0.75      | H26B | 0.75      |
| C17B | 0.25      | H17E | 0.25      | H17F | 0.25      |
| C18B | 0.25      | H18E | 0.25      | H18F | 0.25      |
| C21B | 0.25      | H21C | 0.25      | H21D | 0.25      |
| C22B | 0.25      | H22C | 0.25      | H22D | 0.25      |
| C25B | 0.25      | H25C | 0.25      | H25D | 0.25      |
| C26B | 0.25      | H26C | 0.25      | H26D | 0.25      |

**Table 9 Solvent masks information for final\_BLS\_05-13-22.**

| Number | X     | Y      | Z      | Volume | Electron count | Content |
|--------|-------|--------|--------|--------|----------------|---------|
| 1      | 0.000 | -0.014 | 0.218  | 1206.1 | 409.440        | water   |
| 2      | 0.500 | -0.817 | -0.763 | 1206.1 | 409.440        | water   |

### Refinement model description

Number of restraints - 4, number of constraints - unknown.

#### Details:

1. Fixed Uiso

At 1.2 times of:

All C(H,H) groups

At 1.5 times of:

All C(H,H,H) groups

2. Restrained distances

H18A-O18

1 with sigma of 0.02

O17-H17A



1 with sigma of 0.02  
 O19-H19A  
 1 with sigma of 0.02  
 H19B-O19  
 0.95 with sigma of 0.02  
 3. Uiso/Uaniso restraints and constraints  
 Uanis(C18B) = Uanis(C17B)  
 Uanis(C26B) = Uanis(C25B) = Uanis(C21A) = Uanis(C18B) = Uanis(C17B)  
 4. Others  
 Fixed Sof: C17A(0.75) H17C(0.75) H17D(0.75) C18A(0.75) H18C(0.75) H18D(0.75)  
 C21A(0.75) H21A(0.75) H21B(0.75) C22A(0.75) H22A(0.75) H22B(0.75) C25A(0.75)  
 H25A(0.75) H25B(0.75) C26A(0.75) H26A(0.75) H26B(0.75) C17B(0.25) H17E(0.25)  
 H17F(0.25) C18B(0.25) H18E(0.25) H18F(0.25) C21B(0.25) H21C(0.25) H21D(0.25)  
 C22B(0.25) H22C(0.25) H22D(0.25) C25B(0.25) H25C(0.25) H25D(0.25) C26B(0.25)  
 H26C(0.25) H26D(0.25)  
 Fixed Uiso: H18A(0.08) H17A(0.08) H18B(0.08) H17B(0.08) H19A(0.08) H19B(0.08)  
 5.a Secondary CH2 refined with riding coordinates:  
 C2(H2A,H2B), C3(H3A,H3B), C4(H4A,H4B), C6(H6A,H6B), C7(H7A,H7B), C8(H8A,H8B),  
 C10(H10A,H10B), C11(H11A,H11B), C12(H12A,H12B), C16(H16A,H16B), C20(H20A,H20B),  
 C24(H24A,H24B), C17A(H17C,H17D), C18A(H18C,H18D), C21A(H21A,H21B), C22A(H22A,  
 H22B), C25A(H25A,H25B), C26A(H26A,H26B), C17B(H17E,H17F), C18B(H18E,H18F),  
 C21B(H21C,H21D), C22B(H22C,H22D), C25B(H25C,H25D), C26B(H26C,H26D)  
 5.b Idealised Me refined as rotating group:  
 C14(H14A,H14B,H14C), C28(H28A,H28B,H28C)

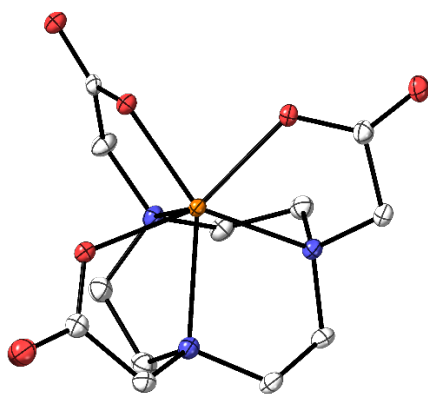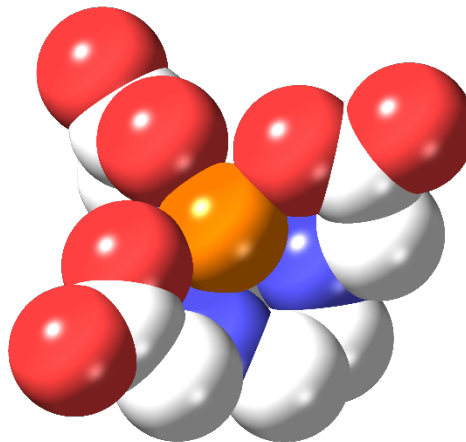

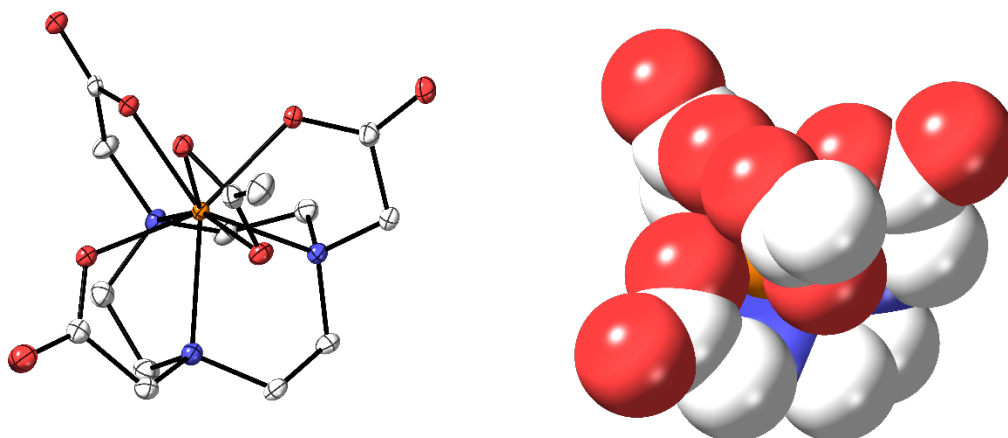

*Figure S1. Molecular structure of Sc(NOTA) (top) and  $[\text{Sc}(\text{NOTA})(\text{OOCCH}_3)]^{1-}$  (bottom). Spacefilling models of the structures (based on VanderWalls radii) are shown for comparison obtained from the single crystal X-ray data.*

A discussion of the stereoelectronic coordination of the  $\text{Sc}^{3+}$  by  $\text{NOTA}^{3-}$  is provided in the text. Both a steric and electronic driving force seem to contribute to the coordination of the  $\kappa_2$ - $(\text{OOCCH}_3)$ . Above, the spacefilling model of the  $[\text{Sc}(\text{NOTA})(\text{OOCCH}_3)]^{1-}$  fragment, both with and without the  $\text{OOCCH}_3^-$  displayed, shows the incomplete steric saturation provided by the hexadentate  $\text{NOTA}^{3-}$  fragment alone.

## HRMS Analysis

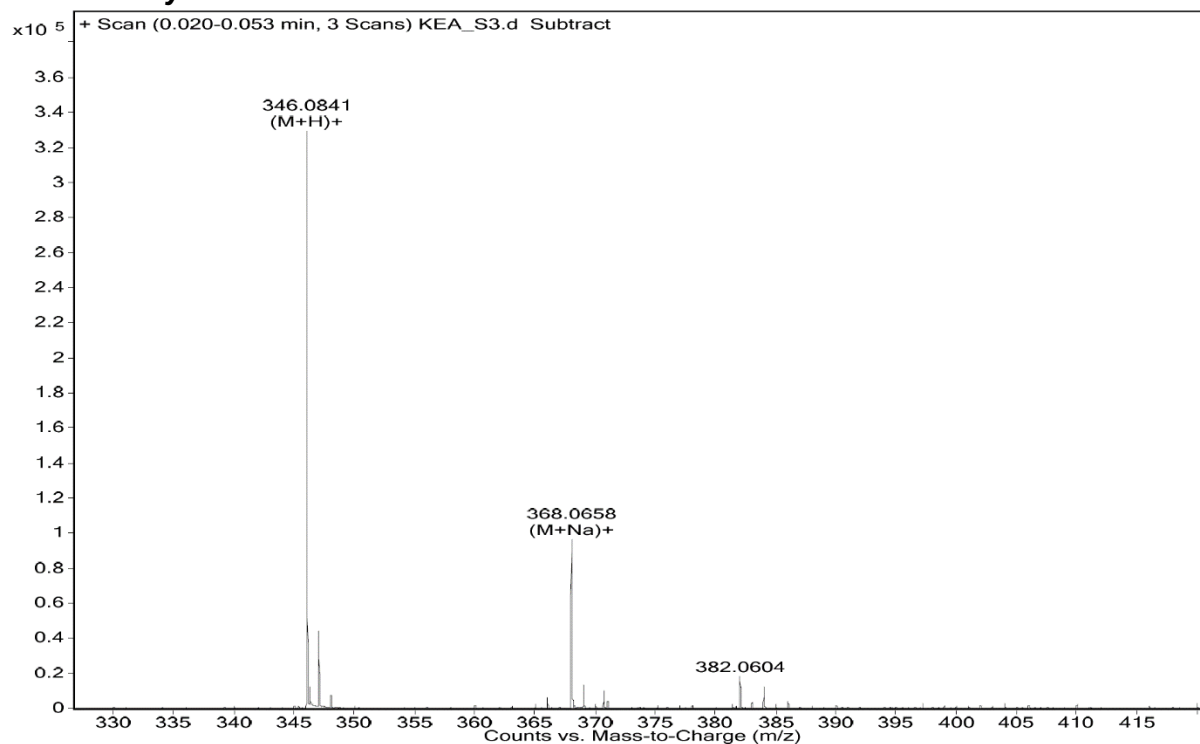

Figure S2. Mass Spectrum for Sc(NOTA) (ToF, positive mode).

## MS Discussion

Observed by mass spec were two cations  $[M+H]^+$  and  $[M+Na]^+$ . Here,  $M = [Sc(NOTA)]$ , the neutral chelated metal complex without the inclusion of a capping ligand. This observation is consistent with previous reports where a capping ligand is lost during ionization. Scanning in positive ion mode demonstrates the chelation of the NOTA macrocycle to the  $Sc^{3+}$ .

## ***NMR Spectroscopy***

### *General NMR Considerations*

All NMR spectra were collected on a Bruker Avance 400 MHz spectrum or operating with a 5 mm broadband probe.  $^1\text{H}$  NMR data was collected at 400.13 MHz in  $\text{D}_2\text{O}$  or  $\text{dms}\text{-d}_6$  and referenced to the residual solvent peak as 4.79 ppm or 2.50 ppm respectively.  $^{45}\text{Sc}$  NMR data was collected at 97.198 MHz, again in  $\text{D}_2\text{O}$  or  $\text{dms}\text{-d}_6$ . Chemical shifts were referenced to an external standard of  $\text{Sc}(\text{NO}_3)_3$  (5 to 10 mg) dissolved in  $\text{D}_2\text{O}$  as 0 ppm.  $^{17}\text{O}$  NMR was collected at 54.243 MHz and referenced to the  $^{17}\text{O}$  NMR signal in tap water as 0 ppm. Samples were prepared using of  $\text{Na}[\text{Sc}(\text{NOTA})(\text{OOCCH}_3)]$  (5 – 10 mg) dissolved in approximately 0.75 mL of solution.  $^{45}\text{Sc}$  NMR acquisition parameters were as follows:

In  $\text{D}_2\text{O}$

TD: 2048

d1: 0.1 sec

SW: 96153.8 hz

p1: 24.2  $\mu\text{S}$

pulse program: zgpg30

in  $\text{dms}\text{-d}_6$

TD: 2048

d1: 0.5 sec

SW: 96153.8 hz

p1: 24.2  $\mu\text{S}$

pulse program: zgpg30

$^1\text{H}$  and  $^{17}\text{O}$  NMR acquisition parameters were unmodified from standard Bruker pulse sequences.

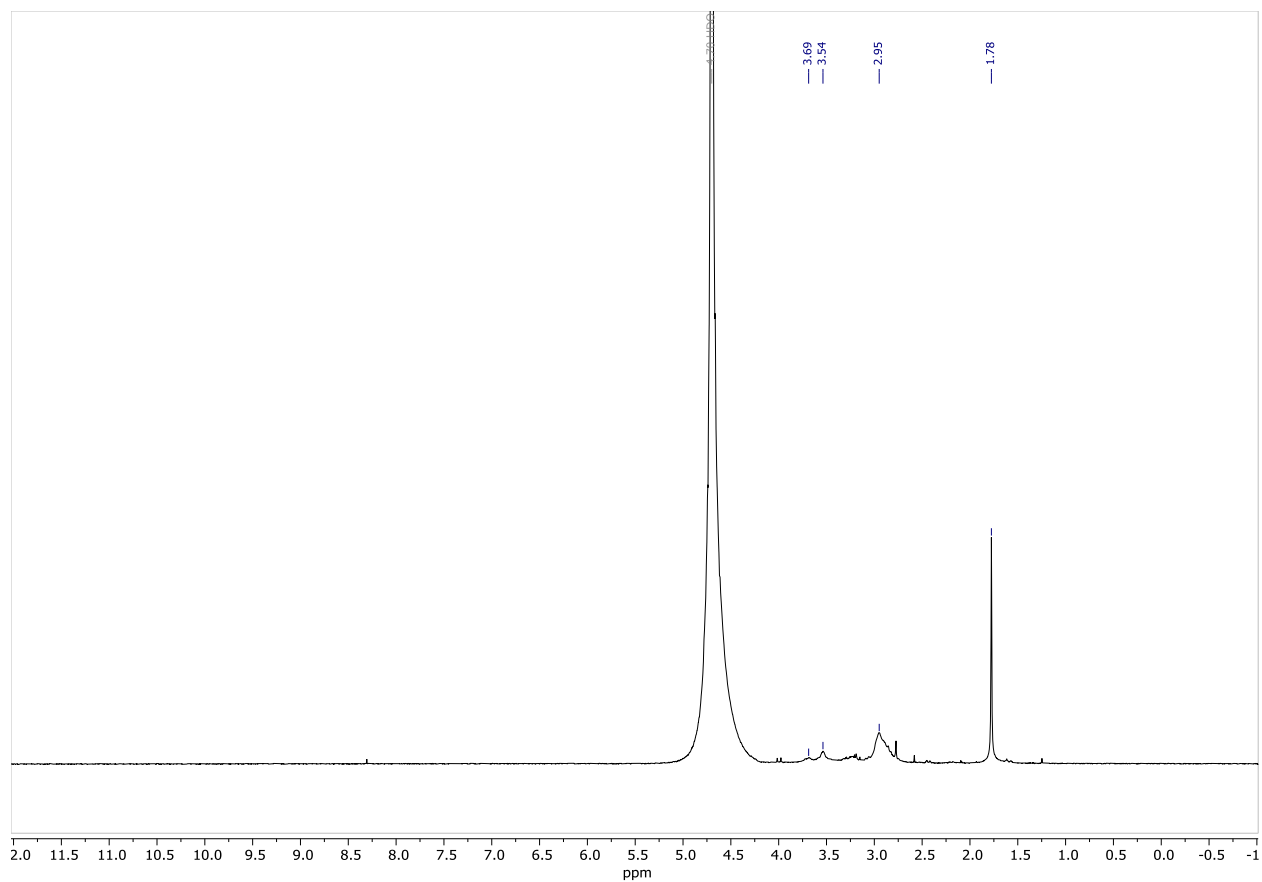

*Figure S3.  $^1\text{H}$  NMR of  $\text{Na}[\text{Sc}(\text{NOTA})(\text{OOCCH}_3)]$  in  $\text{D}_2\text{O}$  at  $20\text{ }^\circ\text{C}$  ( $\text{pH} = 7$ ). Broad peaks indicative of an exchange process.*

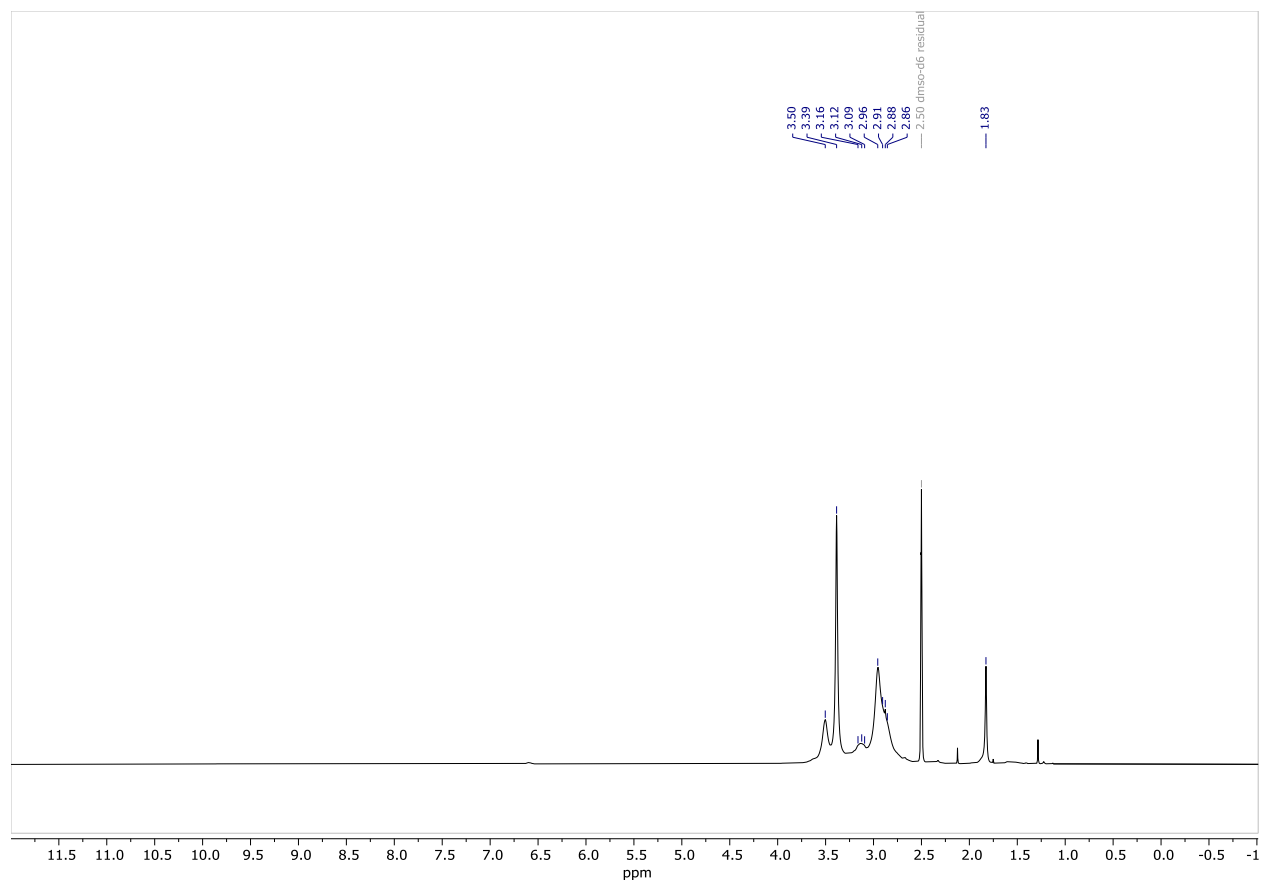

Figure S4.  $^1\text{H}$  NMR of  $\text{Na}[\text{Sc}(\text{NOTA})(\text{OOCCH}_3)]$  in  $\text{DMSO-}d_6$  at  $20\text{ }^\circ\text{C}$ .

Note, in Figures S3 and 4 above, the broadness of the peaks indicates that there may be a dynamic structural rearrangement in solution. This could be due to isomeric shifts as has frequently been observed with +3 metal cations and the related ligand DOTA.<sup>4-7</sup> In solution, such complexes can alternate between a square antiprismatic arrangement and a twisted square antiprismatic arrangement, where there is more or less alignment between the macrocyclic nitrogen and its respective acetate functional arm. This broadness precluded the observation of adequate signal to noise in  $^{13}\text{C}$  NMR attempts with the sample concentrations utilized for additional  $^{45}\text{Sc}$  NMR experiments.

Name: M1  
From: 30.441 ppm  
To: 155.000 ppm  
Residual Error: 2.53e+12  
# ppmHeight Width(Hz)GArea  
1 99.8237533518558 1.1905701567207  
2 88.83590837439 0.9926929461968

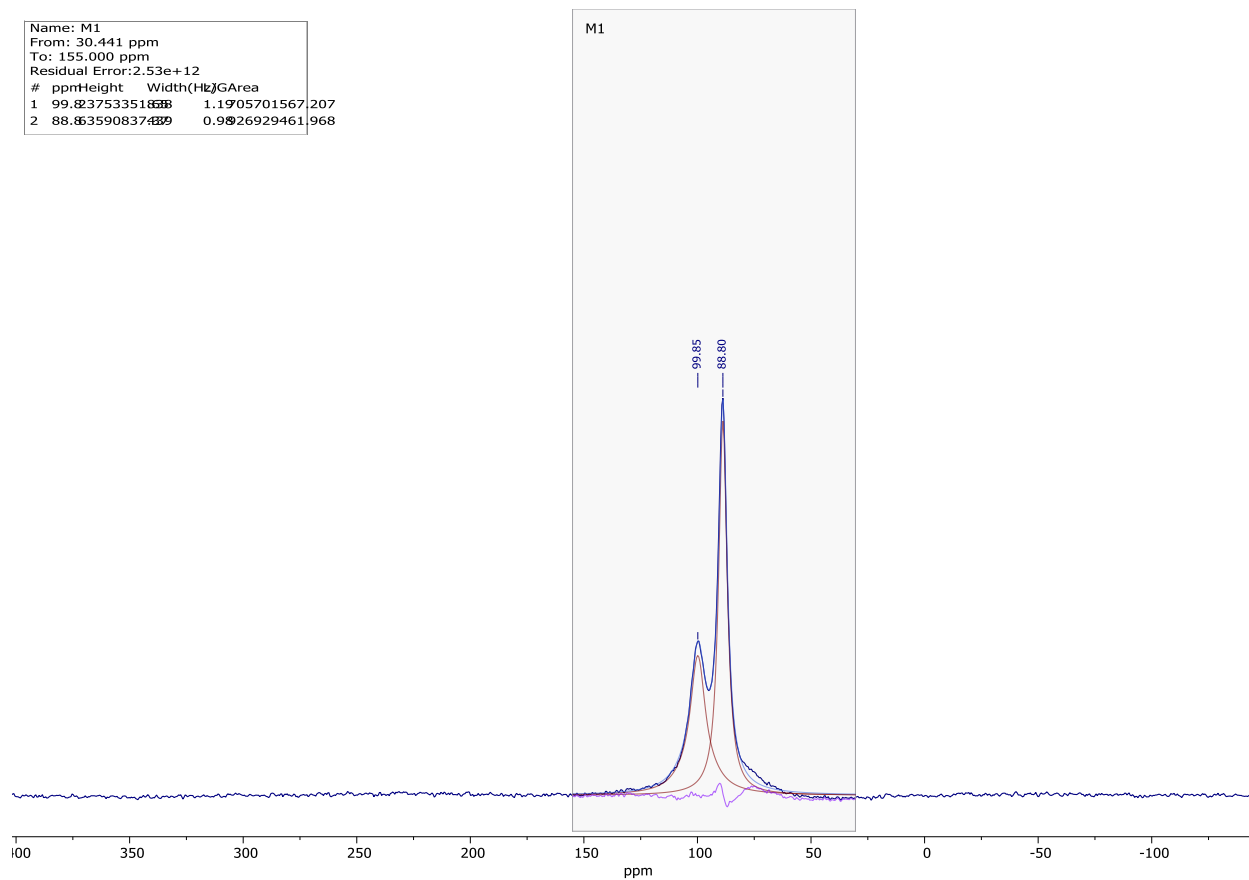

Figure S5.  $^{45}\text{Sc}$  NMR of  $\text{Na}[\text{Sc}(\text{NOTA})(\text{OOCCH}_3)]$  in  $\text{D}_2\text{O}$  at  $20\text{ }^\circ\text{C}$ .

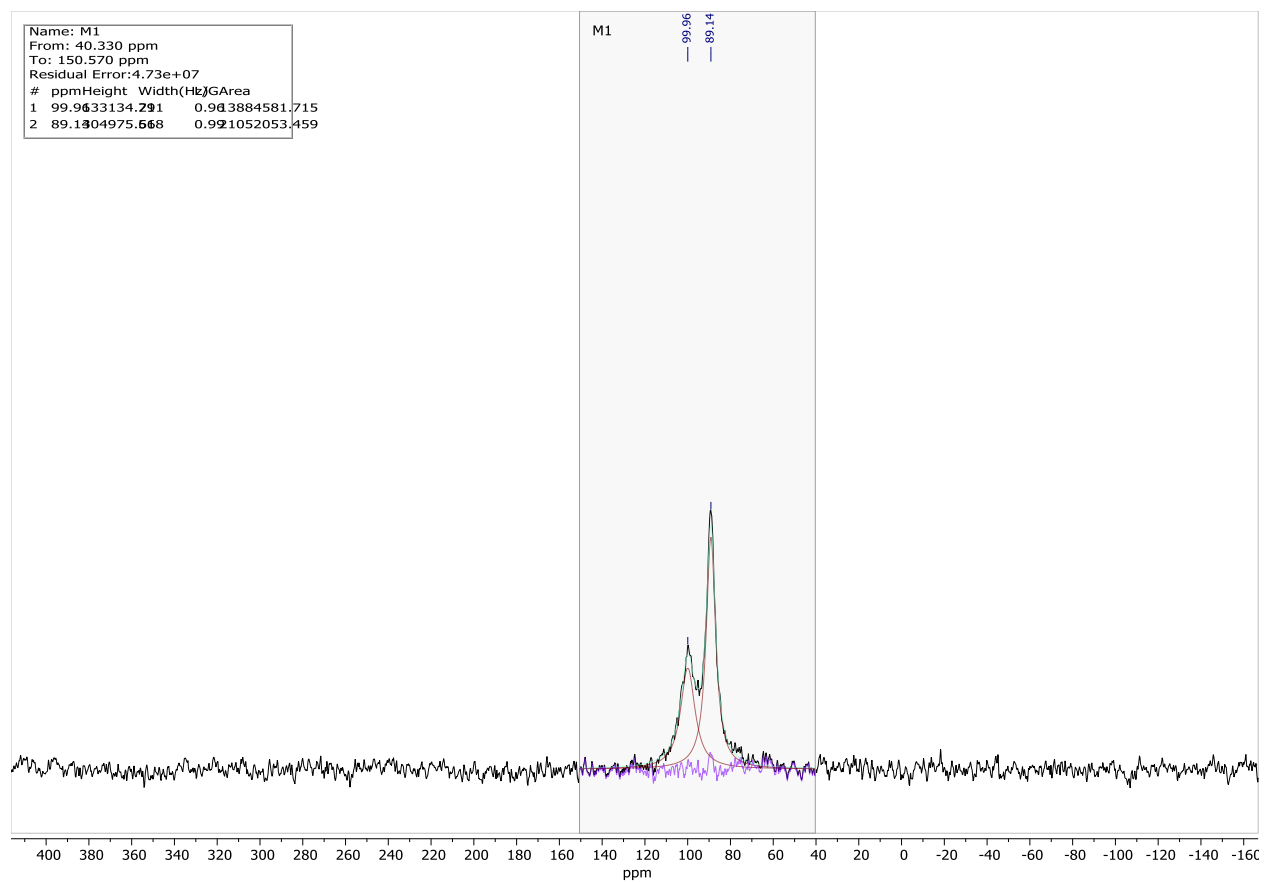

Figure S6.  $^{45}\text{Sc}$  NMR of  $\text{Na}[\text{Sc-NOTA-OAc}]$  in  $\text{D}_2\text{O}$  at  $40\text{ }^\circ\text{C}$ . Peak fitting was applied.



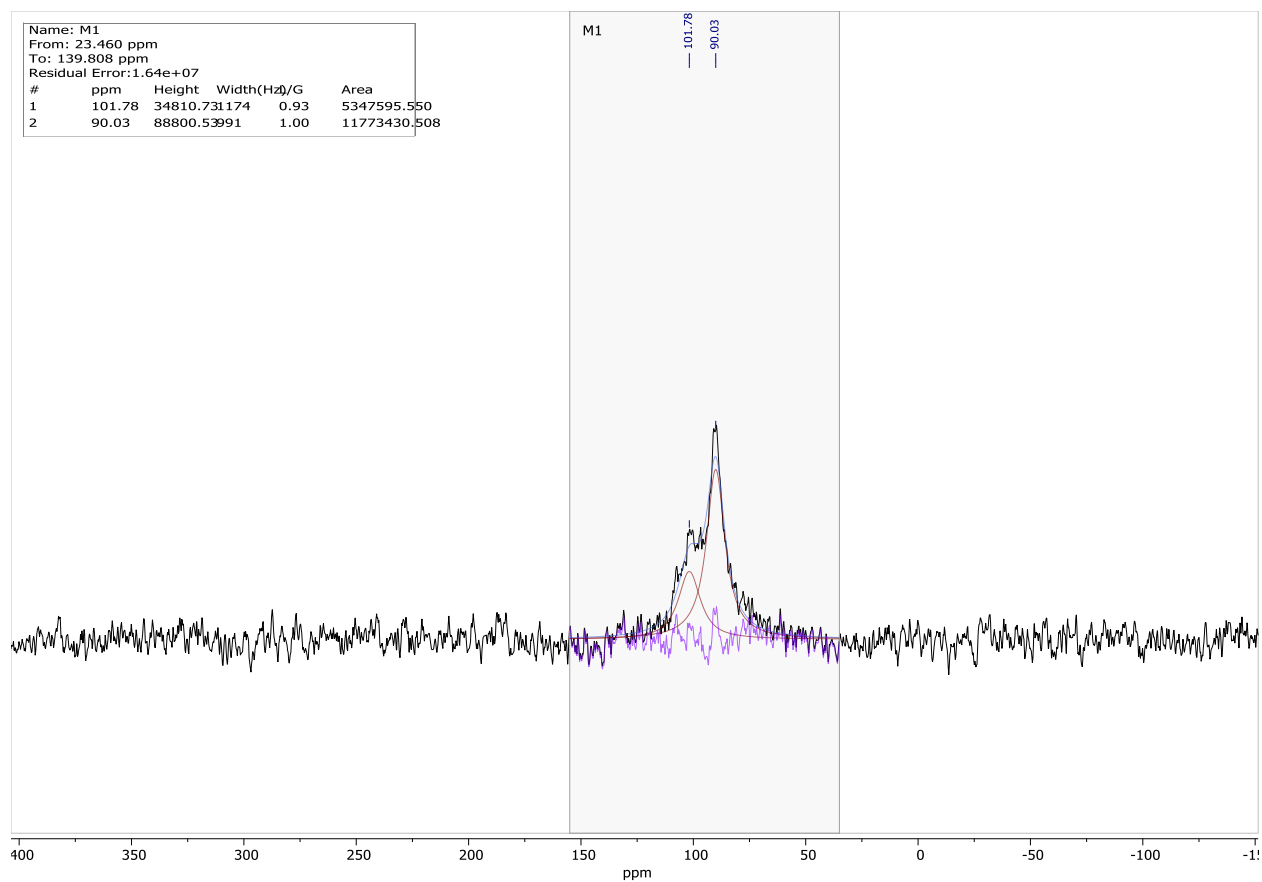

Figure S7.  $^{45}\text{Sc}$  NMR of  $\text{Na}[\text{Sc-NOTA-OAc}]$  in  $\text{D}_2\text{O}$  at  $80\text{ }^\circ\text{C}$ . Peak fitting was applied

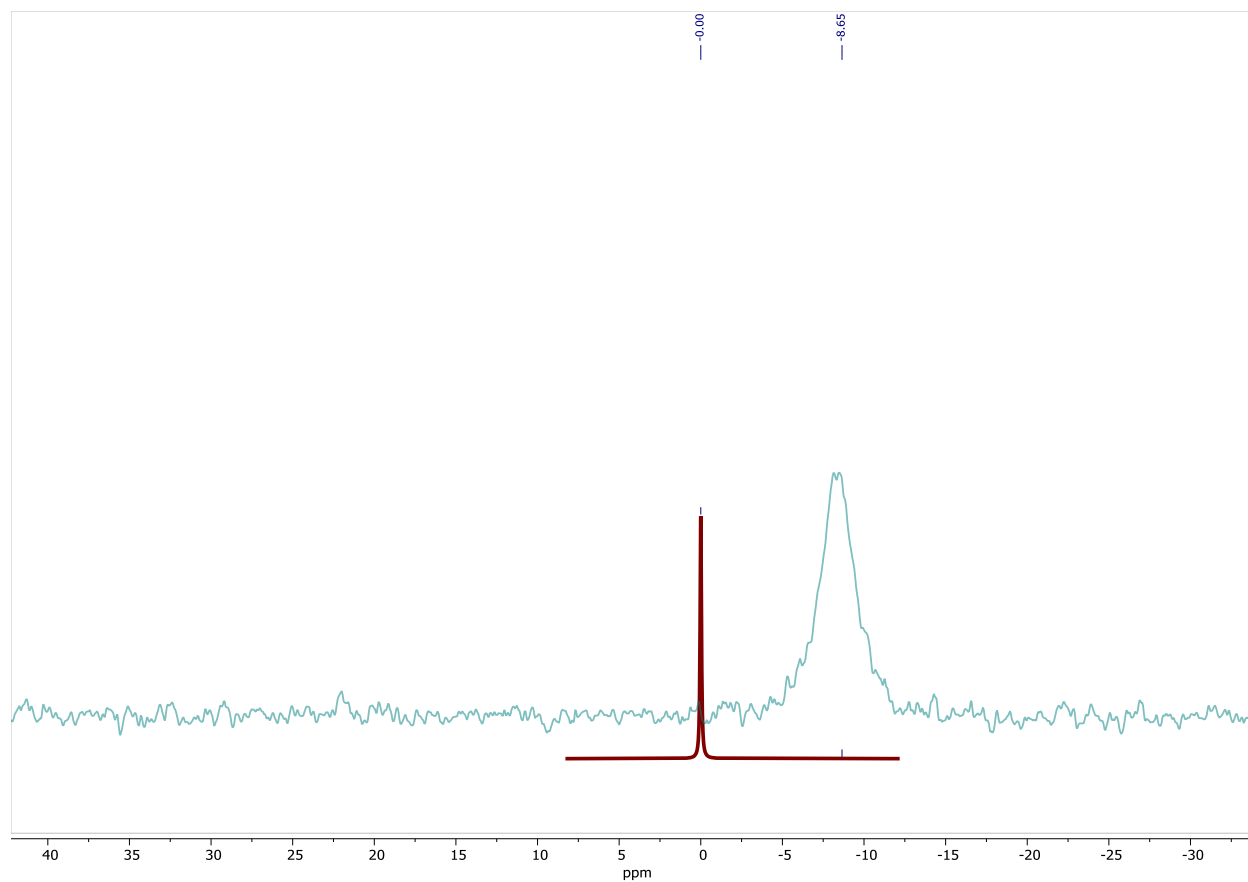

Figure S8.  $^{17}\text{O}$  NMR spectra of tap water (red) and  $\text{Na}[\text{Sc}(\text{NOTA})(\text{OOCCH}_3)]$  in  $\text{D}_2\text{O}$  spiked with  $\text{H}_2(^{17}\text{O})$  (green) at 25 °C.

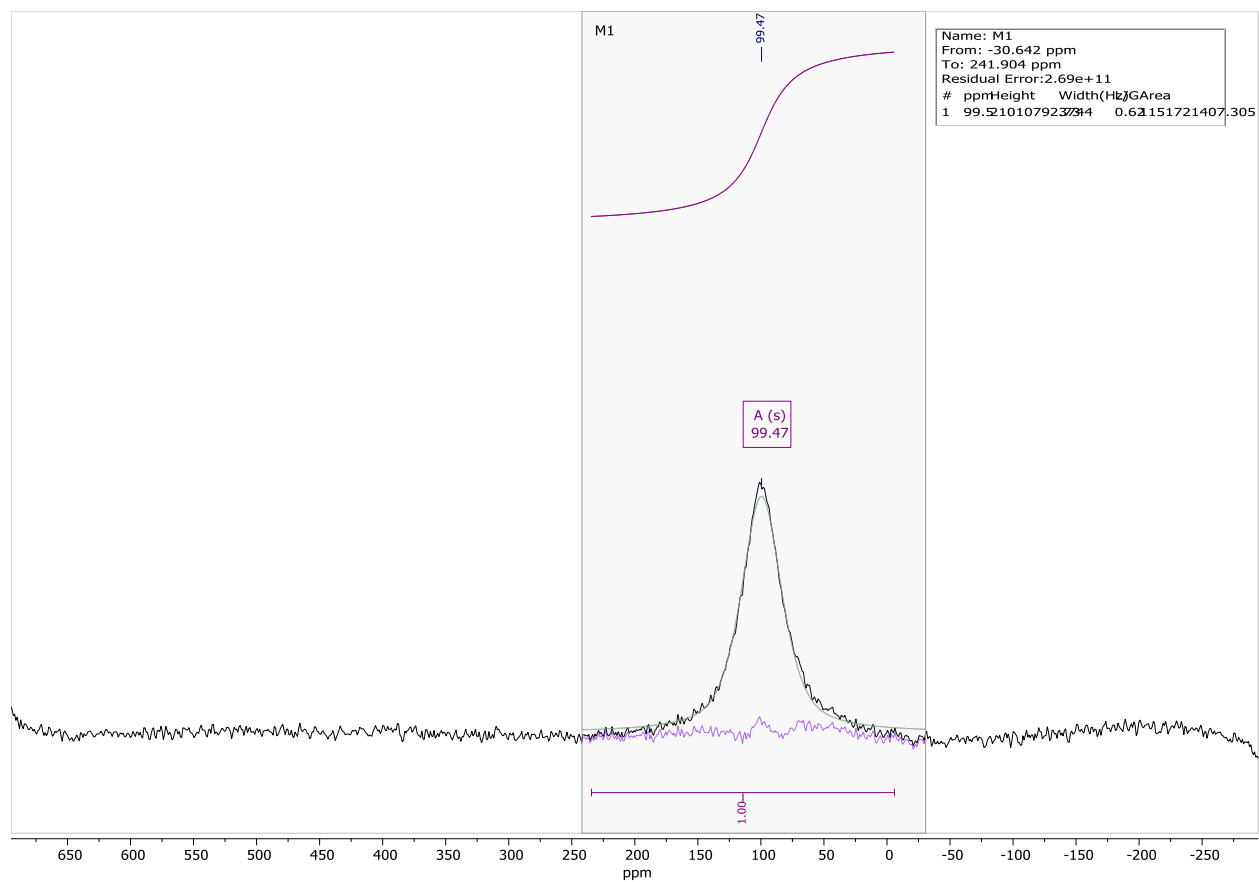

Figure S9.  $^{45}\text{Sc}$  NMR of  $\text{Na}[\text{Sc}(\text{NOTA})(\text{L})]$  in  $\text{dms0-d}_6$  at  $20\text{ }^\circ\text{C}$ . (where  $\text{L} = \text{OOCCH}_3$ ,  $\text{DMSO}$ ,  $\text{H}_2\text{O}$  or a combination of these)

## Experimental Approximation of Exchange Process Thermodynamics

Rearrangement of the Eyring equation, relating a reaction rate constant and the free energy of the reaction, leads to the Van't Hoff equation shown in Eq. 1 and reiterated here:

$$\ln(K_{eq}) = \frac{-\Delta H^\circ}{R} \cdot \left(\frac{1}{T}\right) + \frac{\Delta S^\circ}{R} \quad \text{Eq. S1}$$

Experimental determination of  $K_{eq}$  for a given equilibrium can be made at varying temperatures. Plotting  $(1/T)$  as the  $x$  parameter, and  $\ln(K_{eq})$  as the  $y$  parameter, it follows that  $\Delta H^\circ = (-R \times \text{slope})$  and  $\Delta S^\circ = (R \times \text{intercept})$  of the linear regression relating  $x$  and  $y$ . This approach was applied to the experimentally determined species distribution of **1** [Sc(NOTA)(OH<sub>2</sub>)] and **2** (Na[Sc(NOTA)(OOCCH<sub>3</sub>)]) by <sup>45</sup>Sc NMR spectroscopy at 3 different temperatures in D<sub>2</sub>O.

We acknowledge that this approach assumes the peak areas are roughly proportional to the species concentrations in solutions, which would require similar quadrupole relaxation environments around the <sup>45</sup>Sc nuclei. Thus, we treat this exercise as an experimental approximation, rather than a strict, quantitative determination of the thermodynamics of the equilibrium process considered. Deconvolution of the overlapping <sup>45</sup>Sc NMR peaks was accomplished by analyzing the fourier transformed FID at each temperature using the peak fitting regime in MestreNova's software suite (V14.1.2). The results of these fits supplied the relative values given as "Area" and the calculated "% Area" in Table S4, below.

The NMR solution utilized for these experiments was prepared as follows: 18 mg of single-crystals (427 g/mol, 42 μmol) of Na[Sc(NOTA)(OOCCH<sub>3</sub>)] were dissolved in 0.75 mL of D<sub>2</sub>O to yield a solution that was ~0.056 M in [Sc-complex]. This concentration was used to calculate approximate *in situ* concentrations based on the area % found for the two species.

To clarify the assumptions made to reach the simplified equation for  $K_{eq}$  (Eq. 2), note that as water addition occurs to [Sc(NOTA)(OOCCH<sub>3</sub>)]<sup>1-</sup>, an equivalent amount of the hydrated product species, [Sc(NOTA)(OOCCH<sub>3</sub>)(OH<sub>2</sub>)]<sup>1-</sup>, is generated. Thus, the total initial concentration of Sc(NOTA) complex added can be described as:

$$[Sc(NOTA)(OOCCH_3)^-]_i = [Sc(NOTA)(OOCCH_3)^-]_{eq} + [Sc(NOTA)(OOCCH_3)(OH_2)^-]_{eq} \quad \text{Eq. S2}$$

When treating the denominator of the  $K_{eq}$  equation (Eq. 2), the equilibrium occurs in water as the solvent. Therefore, if we approximate water as a pure liquid (~55.5 M, > 1000× more concentrated than any solutes), the activity is equal to 1 ([a<sub>H<sub>2</sub>O</sub>] = 1)), so it cancels out of the equation, leaving the simple relationship that:

$$K_{eq} \approx \frac{[Sc(NOTA)(OOCCH_3)(OH_2)^-]}{[Sc(NOTA)(OOCCH_3)^-]} \quad \text{Eq. S3}$$

Given that the two concentrations sum to the initial concentrations, their area% are proportional to their relative concentrations; thus  $\ln(K_{eq})$  can be easily approximated from the NMR data.

Table S1. Van't Hoff plot parameters for VT <sup>45</sup>Sc NMR species distributions.

| Temperature (°C) | Species No. | Shift (ppm) | Splitting (Hz) | Fitted Area | Area% | 1/T (K <sup>-1</sup> ) | Ln(K <sub>eq</sub> ) (calc'd) |
|------------------|-------------|-------------|----------------|-------------|-------|------------------------|-------------------------------|
| 20               | 1           | 99.9        | 4520           | 7.06E08     | 0.432 | 0.00341                | -                             |
|                  | 2           | 88.6        |                | 9.27E08     | 0.568 |                        | 0.27269                       |
| 40               | 1           | 99.96       | 4328           | 1.39E07     | 0.397 | 0.00319                | -                             |
|                  | 2           | 89.14       |                | 2.11E07     | 0.603 |                        | 0.41622                       |
| 80               | 1           | 101.78      | 4700           | 5.34E06     | 0.317 | 0.00283                | -                             |
|                  | 2           | 90.03       |                | 1.17E07     | 0.683 |                        | 0.76843                       |

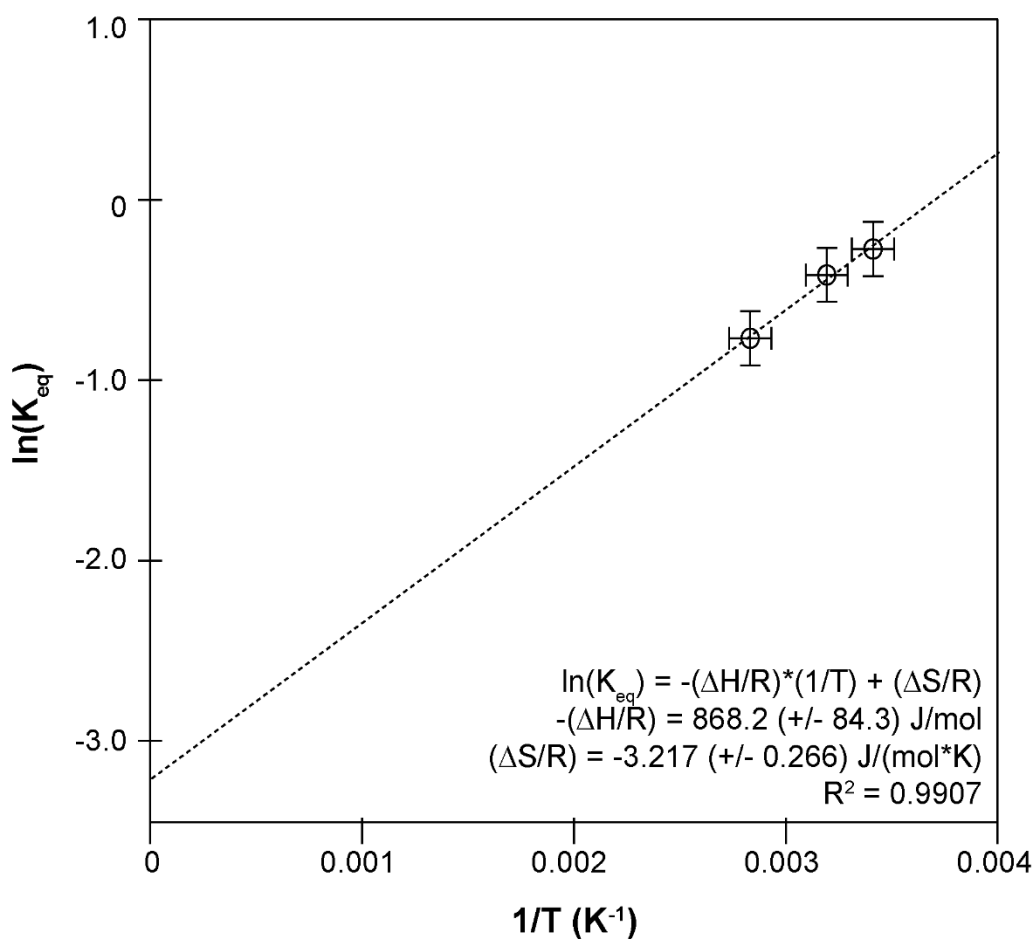

Figure S1. Van't Hoff Plot of VT <sup>45</sup>Sc NMR species distributions in D<sub>2</sub>O (ln(K<sub>eq</sub>) vs. (1/T))

The experimental data was plotted in IgorPro (9.0) and fitted with the standard linear regression included in the software package. The  $R^2 = 0.9907$ . Error estimates for T were converted for the  $x$  parameter based on an estimate of  $\pm 5$  °C probe calibration for temperature. The largest source of error estimated for  $K_{eq}$  is from the fitting error based on the curve separations to find Area and %

Area. The error is approximated at ~10% (a generous estimation from the residuals after curve fitting was applied in MestreNova).

### ***IR Spectroscopy***

IR spectroscopy was conducted using a commercial ThermoFisher Scientific Nicolet ID5 ATR-FTIR. Single crystals of the Na[Sc(NOTA)(OOCCH<sub>3</sub>)] were dried briefly under vacuum and crushed to a powdery consistency. This solid material was deposited in a thin layer over the instrument window and directly measured as the pure solid.

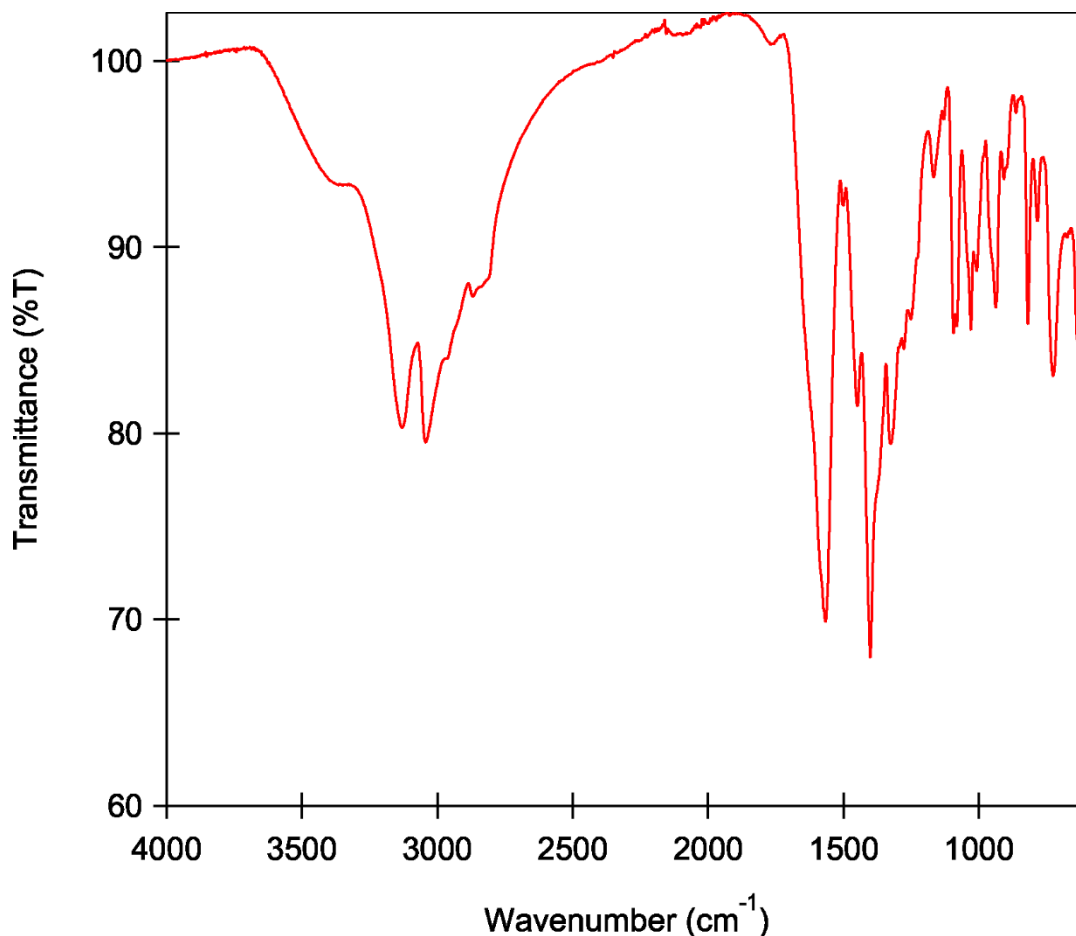

*Figure S2. IR spectrum of solid Na[Sc(NOTA)(OOCCH<sub>3</sub>)], recorded in transmittance mode.*

### ***Discussion of IR***

The absorptive features observed in the IR spectrum of the solid sample agree well with the coordination environment observed for the complex in the single crystal X-ray structure. A variety of C–H stretches are observed in the region from 3300–2850 cm<sup>-1</sup>. Also of note is the sharp feature

at  $1570\text{ cm}^{-1}$  with a broad, sloping shoulder around  $1630$ . These absorptions correlate well with predicted C – O double bond stretches in the acetate arms. Likely a spread of energies occurs as different electrostatic contacts are observed in the solid state. Additionally, another strong absorption appears at  $1400\text{ cm}^{-1}$ . This feature likely correlates to the acetate capping ligand C – O bonds. Finally, the fingerprint region has many sharp, but less intense features which we did not attempt to assign at length.

### Computational Details

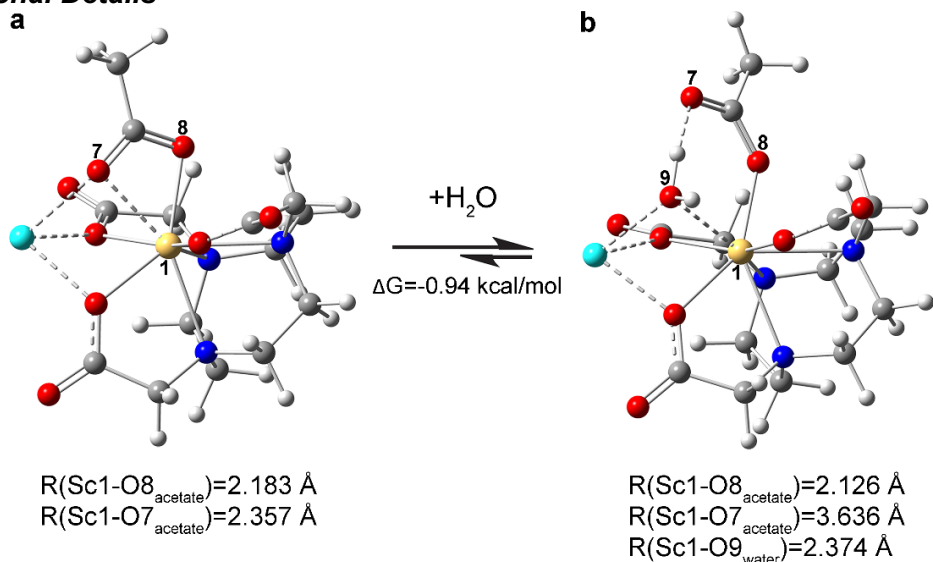

Figure S3. Coordination of water molecule to  $\text{Na}[\text{Sc}(\text{NOTA})(\text{OOCCH}_3)]$  (a) to form  $\text{Na}[\text{Sc}(\text{NOTA})(\text{OOCCH}_3)(\text{H}_2\text{O})]$  (b).

The considered water association is based on the following reaction:

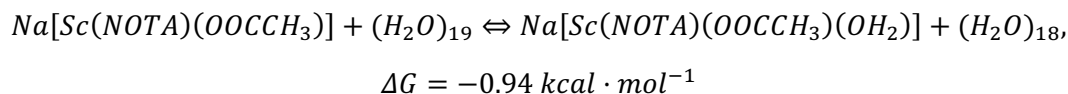

Indeed, the Na ions are unlikely to be found undercoordinated in water solution. Accounting for the possible hydration of Na ions (1<sup>st</sup> coordination sphere) slightly changes the  $\Delta G$  of this reaction:

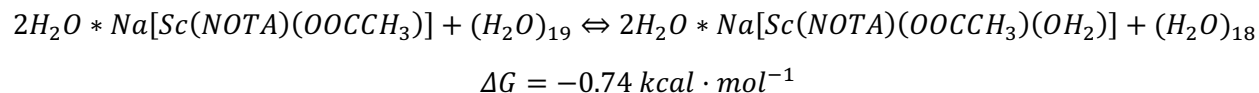

the real solution, there could be more than one coordination sphere around the Na ion (2<sup>nd</sup>, 3<sup>rd</sup>, etc.) that could slightly affect the thermodynamics of the reaction due to the formation of additional hydrogen bonding interactions. However, the Na ions are expected to be similarly coordinated on the left and on the right side of the equations. So, to take advantage of the error cancellation effect (as the energies of reactions 2 and 3 are almost identical), we can employ unhydrated Na ions in our calculations, thus avoiding the necessity to account for all possible hydrogen bonding effects and excessive computational modeling of the hydration process including 2<sup>nd</sup>, 3<sup>rd</sup>, etc. coordination spheres for the  $[\text{Sc}(\text{NOTA})(\text{OOCCH}_3)]^{1-}$  complex as well as for  $\text{NaCH}_3\text{COO}$  in the water-displacement reactions. Indeed, it is clear that the Na ions bound to the  $[\text{Sc}(\text{NOTA})(\text{OOCCH}_3)]^{1-}$  are expected to be hydrated in the real water solution, but the use of the bare Na ions does not change the thermodynamics of the calculations in any appreciable way and thus can be employed here to save computational time. For consistency, a similar approach is further used for the acetate-water substitution reactions (described below) as well as for the possible association/substitution reactions of the  $[\text{Sc}(\text{NOTA})(\text{OOCCH}_3)]^{1-}$  complex with DMSO.



As one can see from Table below, including Na ion (both bare or hydrated Na<sup>+</sup>) helps to describe the structure of the [Sc(NOTA)(OOCCH<sub>3</sub>)]<sup>1-</sup> complex more accurately than excluding it. Presence of the Na ion decreases RMSD value (on all atoms) thus showing smaller deviations of the calculated structures from the experimental crystal structure.

Table S5. Comparison of the bond distances and RMSD values of the [Sc(NOTA)(OOCCH<sub>3</sub>)]<sup>1-</sup>, Na[Sc(NOTA)(OOCCH<sub>3</sub>)] and 2H<sub>2</sub>O\*Na[Sc(NOTA)(OOCCH<sub>3</sub>)] complexes to the experimental XRD structure.

| Sc-NOTA               | Sc-L                                              | Exp.          | Theor.                          | Theor.                            | Theor.                                              |
|-----------------------|---------------------------------------------------|---------------|---------------------------------|-----------------------------------|-----------------------------------------------------|
|                       |                                                   |               | [Sc(NOTA)(OOCCH <sub>3</sub> )] | Na[Sc(NOTA)(OOCCH <sub>3</sub> )] | 2H <sub>2</sub> O*Na[Sc(NOTA)(OOCCH <sub>3</sub> )] |
|                       | Sc – O <sub>NOTA</sub> (Avg., Å)                  | 2.148 (0.019) | 2.132                           | 2.136                             | 2.133                                               |
|                       | Sc – N <sub>NOTA</sub> (Avg., Å)                  | 2.390 (0.024) | 2.467                           | 2.423                             | 2.427                                               |
| Sc–OOCCH <sub>3</sub> | Sc – O <sub>OOCCH<sub>3</sub></sub> (1) (Avg., Å) | 2.197 (0.023) | 2.195                           | 2.183                             | 2.180                                               |
|                       | Sc – O <sub>OOCCH<sub>3</sub></sub> (2) (Avg., Å) | 2.352(0.035)  | 2.322                           | 2.357                             | 2.342                                               |
|                       | RMSD from exp, Å                                  |               | 0.251                           | 0.206                             | 0.165                                               |

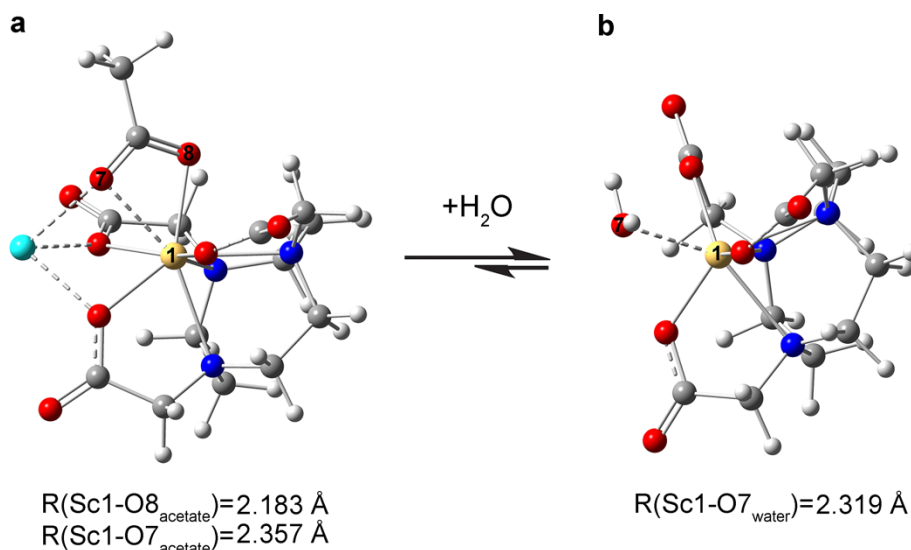

Figure S4. Acetate-water substitution in the Na[Sc(NOTA)(OOCCH<sub>3</sub>)] complex (a) to form [Sc(NOTA)(OH<sub>2</sub>)] (b).

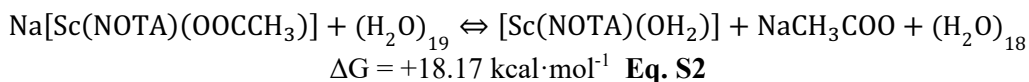

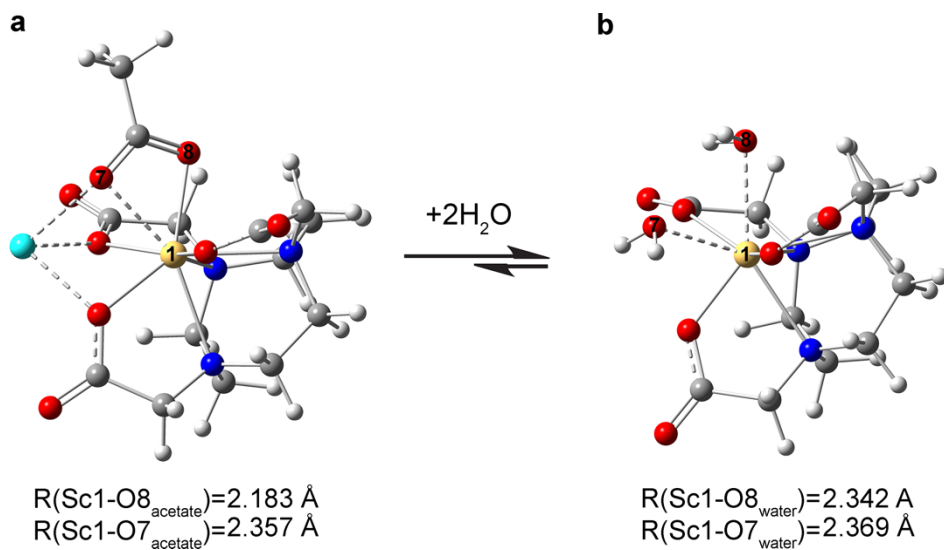

Figure S5. Acetate-water substitution with two water molecules to the  $\text{Na}[\text{Sc}(\text{NOTA})(\text{OOCCH}_3)]$  complex (a) to form  $[\text{Sc}(\text{NOTA})(\text{OH}_2)_2]$  (b).

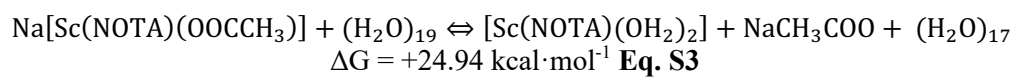

### a) Water-Association with $\gamma$ -Acetate

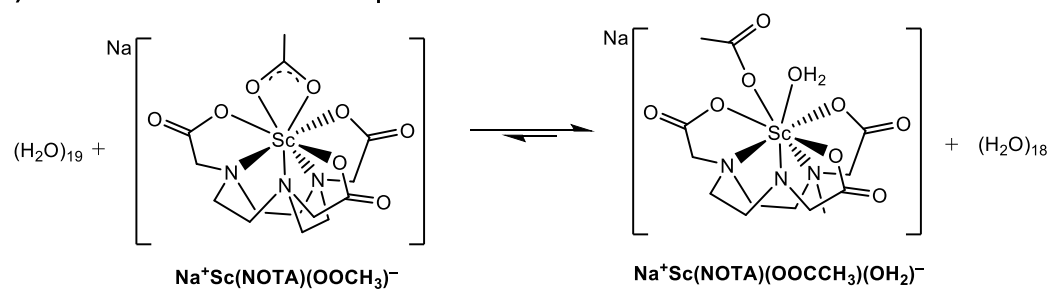

$$\Delta G = -0.94 \text{ kcal/mol}$$

### b) Water-Acetate Exchange

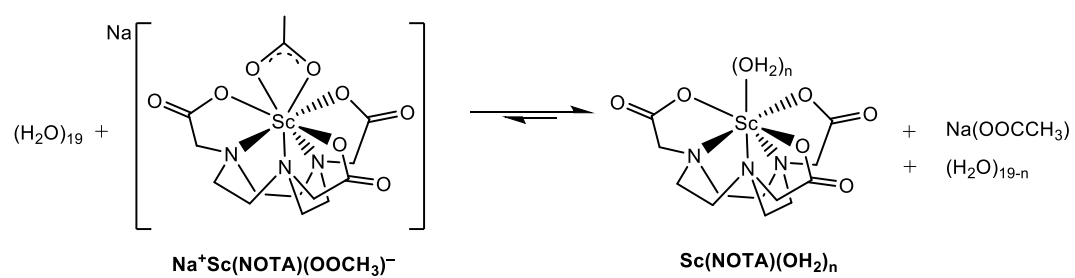

$$\Delta G = 18.17 \text{ (n = 1) or } 24.94 \text{ (n = 2) kcal/mol}$$

### a) Water-Association with $1$ -Acetate

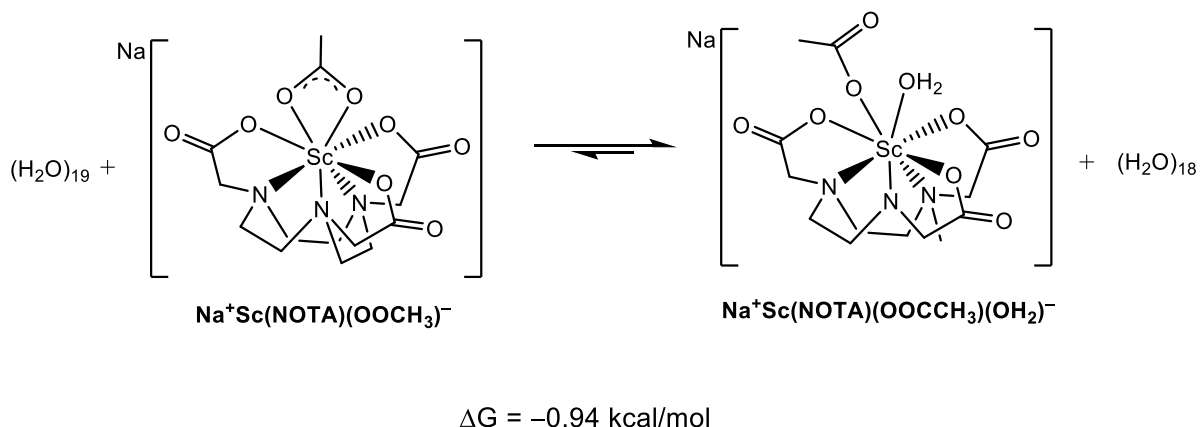

### b) Water-Acetate Exchange

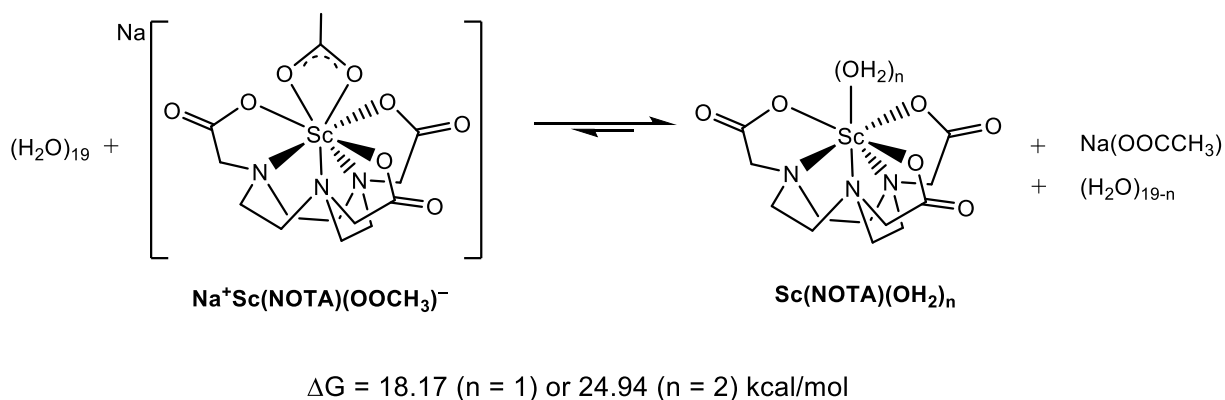

Figure S6. Exchange processes calculated and associated Gibbs free energy change for both the association (a) and exchange mechanisms (b).

### Discussion of Bulk Water Treatment Using the Cluster Approach

Coordination of water molecule to  $\text{Na}[\text{Sc}(\text{NOTA})(\text{OOCCH}_3)]$  was considered using four approaches (a-d) based on the global minimum structures of water clusters previously determined in gas-phase calculations.<sup>8</sup> Note, in each case, the structures of the  $(\text{H}_2\text{O})_n$  and  $(\text{H}_2\text{O})_{n+1}$  clusters were fully optimized in a water continuum using the PCM model:

a) Using the  $(\text{H}_2\text{O})_{17}$  cluster on the left side of the equation, and  $(\text{H}_2\text{O})_{16}$  on its right side:

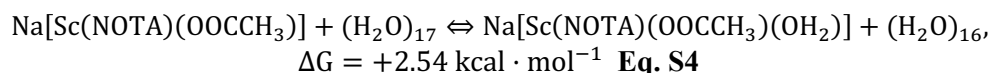

b) Using the  $(\text{H}_2\text{O})_{18}$  cluster on the left side of the equation, and  $(\text{H}_2\text{O})_{17}$  on its right side:

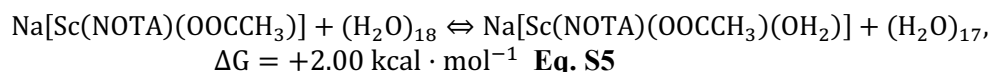

c) Using the (H<sub>2</sub>O)<sub>19</sub> cluster on the left side of the equation, and (H<sub>2</sub>O)<sub>18</sub> on its right side:

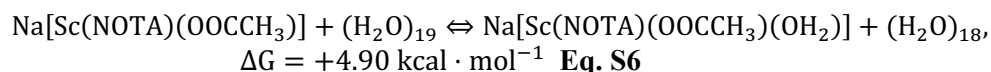

d) Using the (H<sub>2</sub>O)<sub>19</sub> cluster on the left side of the equation, and (H<sub>2</sub>O)<sub>18</sub> on its right side. The geometry of the (H<sub>2</sub>O)<sub>18</sub> cluster was fully optimized in the water medium in PCM. (H<sub>2</sub>O)<sub>19</sub> was modeled by adding one water molecule to (H<sub>2</sub>O)<sub>18</sub> and optimizing it to its local minimum.

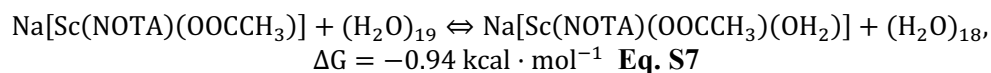

As shown previously, a large structural rearrangement occurs from the global minimum (H<sub>2</sub>O)<sub>18</sub> (Pr44244) to the (H<sub>2</sub>O)<sub>19</sub> (globular) cluster in gas phase.<sup>8</sup> In order to minimize the reorganization energy associated with this rearrangement, we considered the (H<sub>2</sub>O)<sub>18</sub> cluster optimized in water PCM as the representative of bulk water due to its similarity to the other water clusters, while the (H<sub>2</sub>O)<sub>19</sub> cluster was obtained by adding one water molecule to (H<sub>2</sub>O)<sub>18</sub> and optimizing it to the local minimum in the water medium in PCM. Please note that these water clusters may not necessarily represent their global minima configurations in the water since their structures were initially determined from the gas-phase calculations and only a local minimization was applied in PCM.<sup>8</sup> Generally, with the increase of the cluster size, the solvation energy of water clusters gets closer to the bulk configuration and its energy. In the bulk, the hydrogen bonding network will not change much with one water molecule more or less. We think that the approach (d) describes the hydration process more accurately due to the significantly smaller structural rearrangement between the (H<sub>2</sub>O)<sub>18</sub> and the new (H<sub>2</sub>O)<sub>19</sub> water clusters.

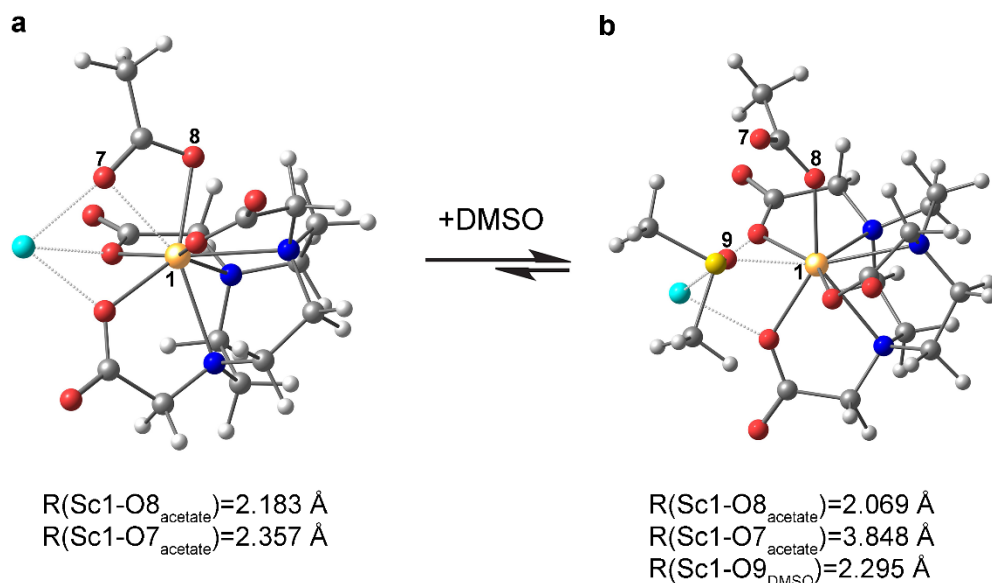

Figure S16. Coordination of DMSO molecule to Na[Sc(NOTA)(OOCCH<sub>3</sub>)].

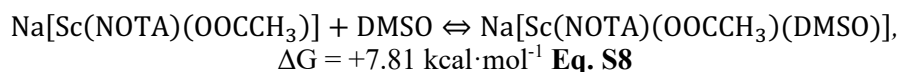

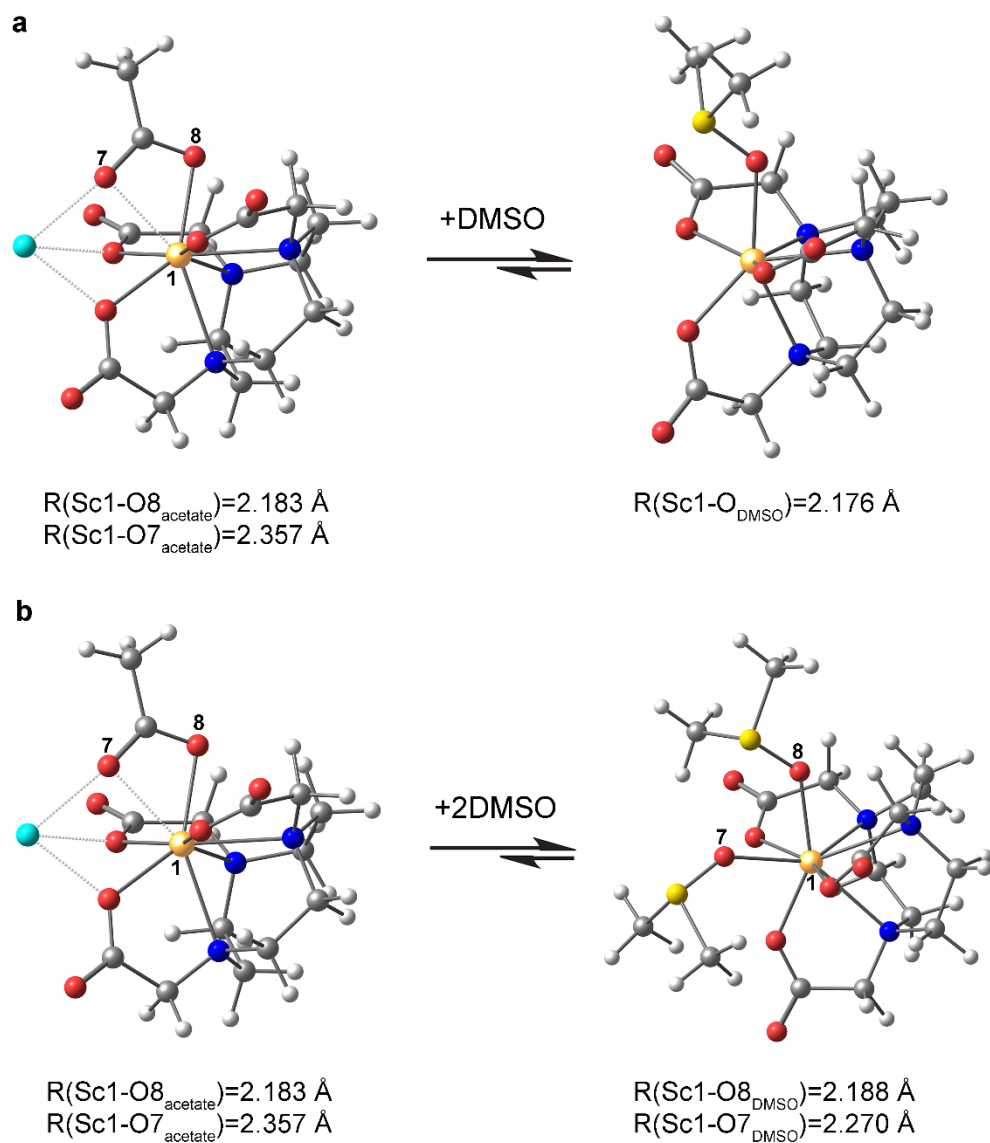

Figure S77. Acetate-DMSO substitution with one (**a**) and two (**b**) DMSO molecules in the  $\text{Na}[\text{Sc}(\text{NOTA})(\text{OOCCH}_3)]$  complex to form  $[\text{Sc}(\text{NOTA})(\text{DMSO})]$  (**a**) and  $[\text{Sc}(\text{NOTA})(\text{DMSO})_2]$  (**b**)

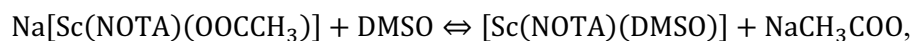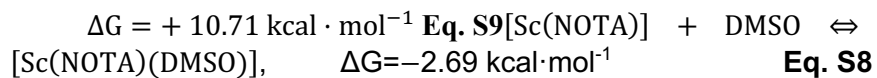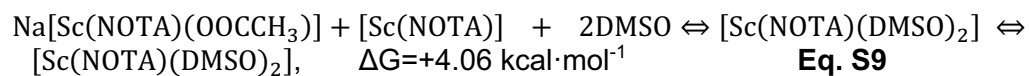

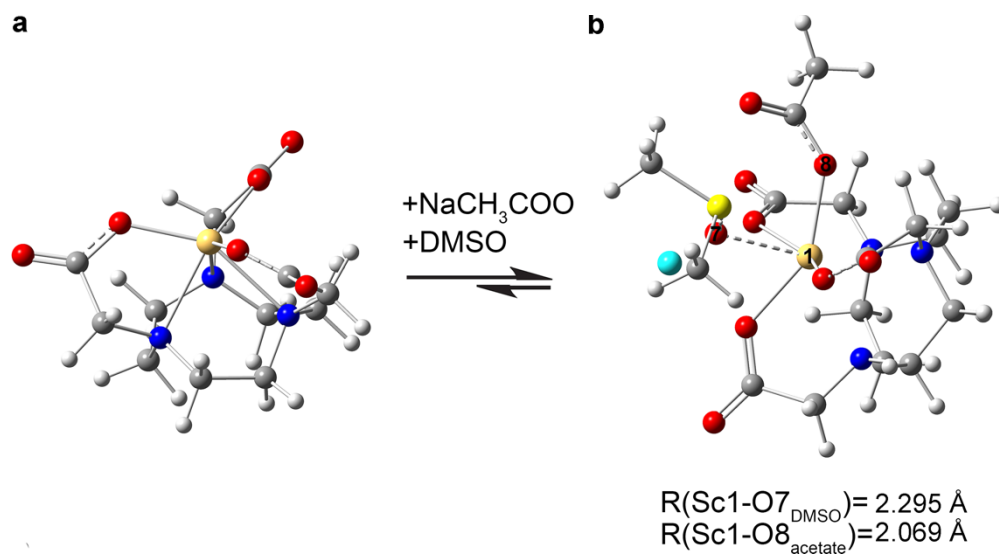

Figure S88. Simultaneous addition of DMSO and NaCH<sub>3</sub>COO to [Sc(NOTA)] (a) to form Na[Sc(NOTA)(CH<sub>3</sub>COO)(DMSO)] (b).

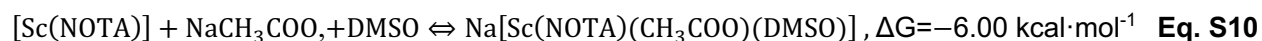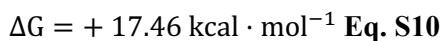

## References

- 1 O. V. Dolomanov, L. J. Bourhis, R. J. Gildea, J. A. K. Howard and H. Puschmann, *J. Appl. Crystallogr.*, 2009, **42**, 339–341.
- 2 G. M. Sheldrick, University of Gottingen, Germany, 2016
- 3 A. L. Spek, *Acta Crystallogr. Sect. C Struct. Chem.*, 2015, **71**, 9–18.
- 4 K. J. Miller, A. A. Saherwala, B. C. Webber, Y. Wu, A. D. Sherry and M. Woods, *Inorg. Chem.*, 2010, **49**, 8662–8664.
- 5 C. Kumas, W. S. Fernando, P. Zhao, M. Regueiro-Figueroa, G. E. Kiefer, A. F. Martins, C. Platas-Iglesias and A. D. Sherry, *Inorg. Chem.*, 2016, **55**, 9297–9305.
- 6 J. Blahut, P. Hermann, Z. Tošner and C. Platas-Iglesias, *Phys. Chem. Chem. Phys.*, 2017, **19**, 26662–26671.
- 7 F. Benetollo, G. Bombieri, L. Calabi, S. Aime and M. Botta, *Inorg. Chem.*, 2003, **42**, 148–157.4
- 8 J. T. Su, X. Xu and W. A. G. Iii, 2004, 10518–10526.
